# Supplementary material
Source: publisher figshare collection journal article supplement (https://gsajournals.figshare.com/ndownloader/files/18042935)
Supplement: Supplementary file 1 [file 18042935]

## Sheet: Sheet1
TABLE S3: BUSCO Assessment of Lh 14 Genomes
Lh14Male		Lh14Female		Lh14Combined M+F		BUSCO was utilized to find shared orthologs among Insecta classification. All BUSCOs and their statuses in both male, female, and joint assemblies are presented here.
# Busco id	Status	# Busco id	Status	# Busco id	Status
EOG090W0028	Fragmented	EOG090W0028	Fragmented	EOG090W0028	Complete
EOG090W002U	Complete	EOG090W002U	Duplicated	EOG090W002U	Complete
EOG090W004H	Complete	EOG090W002U	Duplicated	EOG090W004H	Complete
EOG090W004L	Duplicated	EOG090W002U	Duplicated	EOG090W004L	Complete
EOG090W004L	Duplicated	EOG090W004H	Complete	EOG090W005S	Complete
EOG090W004L	Duplicated	EOG090W004L	Complete	EOG090W005V	Complete
EOG090W005S	Complete	EOG090W005S	Complete	EOG090W006A	Complete
EOG090W005V	Complete	EOG090W005V	Complete	EOG090W006M	Complete
EOG090W006A	Fragmented	EOG090W006A	Fragmented	EOG090W0088	Complete
EOG090W006M	Complete	EOG090W006M	Complete	EOG090W00BP	Complete
EOG090W0088	Fragmented	EOG090W0088	Fragmented	EOG090W00BZ	Complete
EOG090W00BP	Complete	EOG090W00BP	Complete	EOG090W00C1	Complete
EOG090W00BZ	Fragmented	EOG090W00BZ	Fragmented	EOG090W00D0	Fragmented
EOG090W00C1	Complete	EOG090W00C1	Complete	EOG090W00DC	Complete
EOG090W00D0	Fragmented	EOG090W00D0	Fragmented	EOG090W00DE	Complete
EOG090W00DC	Complete	EOG090W00DC	Duplicated	EOG090W00DR	Complete
EOG090W00DE	Complete	EOG090W00DC	Duplicated	EOG090W00E5	Complete
EOG090W00DR	Complete	EOG090W00DC	Duplicated	EOG090W00EM	Complete
EOG090W00E5	Complete	EOG090W00DE	Complete	EOG090W00EP	Complete
EOG090W00EM	Complete	EOG090W00DR	Complete	EOG090W00F0	Complete
EOG090W00EP	Complete	EOG090W00E5	Complete	EOG090W00FN	Complete
EOG090W00F0	Complete	EOG090W00EM	Complete	EOG090W00GG	Complete
EOG090W00FN	Complete	EOG090W00EP	Complete	EOG090W00HC	Complete
EOG090W00GG	Complete	EOG090W00F0	Complete	EOG090W00HE	Complete
EOG090W00HC	Complete	EOG090W00FN	Complete	EOG090W00HJ	Complete
EOG090W00HE	Complete	EOG090W00GG	Complete	EOG090W00HR	Complete
EOG090W00HJ	Complete	EOG090W00HC	Complete	EOG090W00HY	Complete
EOG090W00HR	Complete	EOG090W00HE	Complete	EOG090W00IY	Complete
EOG090W00HY	Fragmented	EOG090W00HJ	Complete	EOG090W00K3	Complete
EOG090W00IY	Complete	EOG090W00HR	Complete	EOG090W00L3	Complete
EOG090W00K3	Fragmented	EOG090W00HY	Fragmented	EOG090W00L4	Fragmented
EOG090W00L3	Complete	EOG090W00IY	Complete	EOG090W00L5	Complete
EOG090W00L4	Fragmented	EOG090W00K3	Fragmented	EOG090W00LR	Complete
EOG090W00L5	Duplicated	EOG090W00L3	Complete	EOG090W00MH	Complete
EOG090W00L5	Duplicated	EOG090W00L4	Fragmented	EOG090W00MS	Complete
EOG090W00L5	Duplicated	EOG090W00L5	Duplicated	EOG090W00MV	Complete
EOG090W00LR	Complete	EOG090W00L5	Duplicated	EOG090W00PB	Complete
EOG090W00MH	Complete	EOG090W00LR	Complete	EOG090W00PK	Complete
EOG090W00MS	Complete	EOG090W00MH	Complete	EOG090W00PL	Complete
EOG090W00MV	Fragmented	EOG090W00MS	Complete	EOG090W00QS	Complete
EOG090W00PB	Complete	EOG090W00MV	Complete	EOG090W00RS	Complete
EOG090W00PK	Missing	EOG090W00PB	Complete	EOG090W00S0	Complete
EOG090W00PL	Duplicated	EOG090W00PK	Complete	EOG090W00S7	Complete
EOG090W00PL	Duplicated	EOG090W00PL	Duplicated	EOG090W00SP	Complete
EOG090W00QS	Complete	EOG090W00PL	Duplicated	EOG090W00TA	Complete
EOG090W00RS	Duplicated	EOG090W00QS	Complete	EOG090W00TM	Complete
EOG090W00RS	Duplicated	EOG090W00RS	Complete	EOG090W00U4	Complete
EOG090W00RS	Duplicated	EOG090W00S0	Complete	EOG090W00U5	Complete
EOG090W00S0	Complete	EOG090W00S7	Complete	EOG090W00UK	Complete
EOG090W00S7	Complete	EOG090W00SP	Complete	EOG090W00UN	Complete
EOG090W00SP	Complete	EOG090W00TA	Complete	EOG090W00VG	Complete
EOG090W00TA	Complete	EOG090W00TM	Complete	EOG090W00VJ	Complete
EOG090W00TM	Complete	EOG090W00U4	Complete	EOG090W00VL	Complete
EOG090W00U4	Complete	EOG090W00U5	Complete	EOG090W00VP	Complete
EOG090W00U5	Complete	EOG090W00UK	Duplicated	EOG090W00VU	Complete
EOG090W00UK	Duplicated	EOG090W00UK	Duplicated	EOG090W00VZ	Complete
EOG090W00UK	Duplicated	EOG090W00UK	Duplicated	EOG090W00WG	Complete
EOG090W00UK	Duplicated	EOG090W00UN	Complete	EOG090W00WM	Fragmented
EOG090W00UN	Complete	EOG090W00VG	Complete	EOG090W00WO	Complete
EOG090W00VG	Complete	EOG090W00VJ	Complete	EOG090W00WR	Fragmented
EOG090W00VJ	Complete	EOG090W00VL	Fragmented	EOG090W00X1	Complete
EOG090W00VL	Fragmented	EOG090W00VP	Duplicated	EOG090W00X3	Complete
EOG090W00VP	Duplicated	EOG090W00VP	Duplicated	EOG090W00X5	Complete
EOG090W00VP	Duplicated	EOG090W00VU	Duplicated	EOG090W00X7	Complete
EOG090W00VU	Duplicated	EOG090W00VU	Duplicated	EOG090W00XH	Complete
EOG090W00VU	Duplicated	EOG090W00VZ	Fragmented	EOG090W00XR	Complete
EOG090W00VZ	Fragmented	EOG090W00WG	Fragmented	EOG090W00Y2	Complete
EOG090W00WG	Fragmented	EOG090W00WM	Fragmented	EOG090W00YL	Complete
EOG090W00WM	Fragmented	EOG090W00WO	Complete	EOG090W00Z4	Complete
EOG090W00WO	Complete	EOG090W00WR	Missing	EOG090W00ZP	Complete
EOG090W00WR	Missing	EOG090W00X1	Complete	EOG090W00ZV	Complete
EOG090W00X1	Complete	EOG090W00X3	Complete	EOG090W00ZZ	Complete
EOG090W00X3	Duplicated	EOG090W00X5	Complete	EOG090W010U	Complete
EOG090W00X3	Duplicated	EOG090W00X7	Complete	EOG090W0116	Complete
EOG090W00X5	Complete	EOG090W00XH	Duplicated	EOG090W011V	Complete
EOG090W00X7	Complete	EOG090W00XH	Duplicated	EOG090W011W	Missing
EOG090W00XH	Duplicated	EOG090W00XR	Complete	EOG090W012F	Complete
EOG090W00XH	Duplicated	EOG090W00Y2	Complete	EOG090W012G	Complete
EOG090W00XR	Complete	EOG090W00YL	Complete	EOG090W012Q	Fragmented
EOG090W00Y2	Complete	EOG090W00Z4	Complete	EOG090W0132	Fragmented
EOG090W00YL	Complete	EOG090W00ZP	Complete	EOG090W013B	Complete
EOG090W00Z4	Complete	EOG090W00ZV	Complete	EOG090W013S	Complete
EOG090W00ZP	Complete	EOG090W00ZZ	Complete	EOG090W013U	Complete
EOG090W00ZV	Complete	EOG090W010U	Complete	EOG090W013Z	Complete
EOG090W00ZZ	Complete	EOG090W0116	Fragmented	EOG090W0140	Complete
EOG090W010U	Complete	EOG090W011V	Complete	EOG090W014R	Complete
EOG090W0116	Fragmented	EOG090W011W	Missing	EOG090W0153	Complete
EOG090W011V	Duplicated	EOG090W012F	Complete	EOG090W015F	Complete
EOG090W011V	Duplicated	EOG090W012G	Complete	EOG090W015H	Complete
EOG090W011W	Missing	EOG090W012Q	Fragmented	EOG090W015K	Complete
EOG090W012F	Complete	EOG090W0132	Complete	EOG090W015U	Complete
EOG090W012G	Complete	EOG090W013B	Complete	EOG090W015V	Complete
EOG090W012Q	Fragmented	EOG090W013S	Complete	EOG090W015Z	Complete
EOG090W0132	Fragmented	EOG090W013U	Fragmented	EOG090W0161	Complete
EOG090W013B	Complete	EOG090W013Z	Complete	EOG090W0165	Fragmented
EOG090W013S	Complete	EOG090W0140	Complete	EOG090W016C	Complete
EOG090W013U	Fragmented	EOG090W014R	Complete	EOG090W016I	Complete
EOG090W013Z	Complete	EOG090W0153	Complete	EOG090W016J	Complete
EOG090W0140	Complete	EOG090W015F	Complete	EOG090W017F	Complete
EOG090W014R	Complete	EOG090W015H	Complete	EOG090W017Q	Complete
EOG090W0153	Complete	EOG090W015K	Complete	EOG090W018Y	Complete
EOG090W015F	Complete	EOG090W015U	Fragmented	EOG090W0199	Complete
EOG090W015H	Complete	EOG090W015V	Complete	EOG090W019B	Duplicated
EOG090W015K	Complete	EOG090W015Z	Complete	EOG090W019B	Duplicated
EOG090W015U	Fragmented	EOG090W0161	Complete	EOG090W019E	Complete
EOG090W015V	Complete	EOG090W0165	Fragmented	EOG090W019H	Complete
EOG090W015Z	Complete	EOG090W016C	Fragmented	EOG090W019K	Fragmented
EOG090W0161	Complete	EOG090W016I	Complete	EOG090W019L	Complete
EOG090W0165	Fragmented	EOG090W016J	Complete	EOG090W019Q	Complete
EOG090W016C	Fragmented	EOG090W017F	Complete	EOG090W019U	Complete
EOG090W016I	Complete	EOG090W017Q	Complete	EOG090W019X	Complete
EOG090W016J	Complete	EOG090W018Y	Complete	EOG090W01A3	Complete
EOG090W017F	Complete	EOG090W0199	Complete	EOG090W01AE	Complete
EOG090W017Q	Complete	EOG090W019B	Duplicated	EOG090W01AX	Complete
EOG090W018Y	Complete	EOG090W019B	Duplicated	EOG090W01BC	Complete
EOG090W0199	Complete	EOG090W019E	Complete	EOG090W01BN	Complete
EOG090W019B	Duplicated	EOG090W019H	Complete	EOG090W01C5	Complete
EOG090W019B	Duplicated	EOG090W019K	Fragmented	EOG090W01C8	Complete
EOG090W019E	Complete	EOG090W019L	Complete	EOG090W01CP	Complete
EOG090W019H	Complete	EOG090W019Q	Complete	EOG090W01D3	Complete
EOG090W019K	Fragmented	EOG090W019U	Complete	EOG090W01DN	Complete
EOG090W019L	Complete	EOG090W019X	Complete	EOG090W01FE	Complete
EOG090W019Q	Duplicated	EOG090W01A3	Complete	EOG090W01FZ	Complete
EOG090W019Q	Duplicated	EOG090W01AE	Duplicated	EOG090W01GD	Complete
EOG090W019U	Fragmented	EOG090W01AE	Duplicated	EOG090W01GU	Complete
EOG090W019X	Complete	EOG090W01AX	Complete	EOG090W01H1	Complete
EOG090W01A3	Complete	EOG090W01BC	Complete	EOG090W01HI	Complete
EOG090W01AE	Duplicated	EOG090W01BN	Complete	EOG090W01HP	Complete
EOG090W01AE	Duplicated	EOG090W01C5	Complete	EOG090W01IA	Complete
EOG090W01AX	Complete	EOG090W01C8	Complete	EOG090W01IP	Complete
EOG090W01BC	Complete	EOG090W01CP	Complete	EOG090W01J0	Complete
EOG090W01BN	Complete	EOG090W01D3	Fragmented	EOG090W01J1	Complete
EOG090W01C5	Complete	EOG090W01DN	Complete	EOG090W01JC	Complete
EOG090W01C8	Fragmented	EOG090W01FE	Complete	EOG090W01JK	Complete
EOG090W01CP	Fragmented	EOG090W01FZ	Complete	EOG090W01JP	Fragmented
EOG090W01D3	Fragmented	EOG090W01GD	Complete	EOG090W01JS	Complete
EOG090W01DN	Complete	EOG090W01GU	Complete	EOG090W01JW	Fragmented
EOG090W01FE	Complete	EOG090W01H1	Fragmented	EOG090W01KF	Complete
EOG090W01FZ	Complete	EOG090W01HI	Fragmented	EOG090W01L3	Complete
EOG090W01GD	Complete	EOG090W01HP	Complete	EOG090W01LK	Complete
EOG090W01GU	Complete	EOG090W01IA	Missing	EOG090W01M6	Complete
EOG090W01H1	Fragmented	EOG090W01IP	Fragmented	EOG090W01MI	Complete
EOG090W01HI	Fragmented	EOG090W01J0	Complete	EOG090W01MS	Complete
EOG090W01HP	Complete	EOG090W01J1	Complete	EOG090W01MU	Complete
EOG090W01IA	Missing	EOG090W01JC	Complete	EOG090W01NH	Duplicated
EOG090W01IP	Fragmented	EOG090W01JK	Fragmented	EOG090W01NH	Duplicated
EOG090W01J0	Complete	EOG090W01JP	Fragmented	EOG090W01NH	Duplicated
EOG090W01J1	Complete	EOG090W01JS	Fragmented	EOG090W01NO	Complete
EOG090W01JC	Complete	EOG090W01JW	Fragmented	EOG090W01NS	Complete
EOG090W01JK	Fragmented	EOG090W01KF	Complete	EOG090W01NX	Complete
EOG090W01JP	Fragmented	EOG090W01L3	Complete	EOG090W01NZ	Complete
EOG090W01JS	Fragmented	EOG090W01LK	Fragmented	EOG090W01OZ	Complete
EOG090W01JW	Fragmented	EOG090W01M6	Complete	EOG090W01PM	Complete
EOG090W01KF	Complete	EOG090W01MI	Complete	EOG090W01PT	Complete
EOG090W01L3	Complete	EOG090W01MS	Complete	EOG090W01QI	Complete
EOG090W01LK	Complete	EOG090W01MU	Fragmented	EOG090W01QT	Complete
EOG090W01M6	Complete	EOG090W01NH	Complete	EOG090W01R3	Complete
EOG090W01MI	Complete	EOG090W01NO	Duplicated	EOG090W01S4	Complete
EOG090W01MS	Complete	EOG090W01NO	Duplicated	EOG090W01SD	Complete
EOG090W01MU	Complete	EOG090W01NS	Complete	EOG090W01SR	Complete
EOG090W01NH	Duplicated	EOG090W01NX	Complete	EOG090W01SV	Complete
EOG090W01NH	Duplicated	EOG090W01NZ	Complete	EOG090W01T1	Complete
EOG090W01NH	Duplicated	EOG090W01OZ	Complete	EOG090W01T7	Complete
EOG090W01NO	Duplicated	EOG090W01PM	Fragmented	EOG090W01TY	Complete
EOG090W01NO	Duplicated	EOG090W01PT	Complete	EOG090W01UN	Complete
EOG090W01NS	Complete	EOG090W01QI	Complete	EOG090W01V1	Complete
EOG090W01NX	Complete	EOG090W01QT	Complete	EOG090W01VD	Complete
EOG090W01NZ	Complete	EOG090W01R3	Fragmented	EOG090W01W5	Complete
EOG090W01OZ	Complete	EOG090W01S4	Complete	EOG090W01W9	Complete
EOG090W01PM	Fragmented	EOG090W01SD	Complete	EOG090W01WI	Complete
EOG090W01PT	Complete	EOG090W01SR	Duplicated	EOG090W01WT	Complete
EOG090W01QI	Complete	EOG090W01SR	Duplicated	EOG090W01X2	Missing
EOG090W01QT	Complete	EOG090W01SR	Duplicated	EOG090W01XB	Duplicated
EOG090W01R3	Fragmented	EOG090W01SV	Complete	EOG090W01XB	Duplicated
EOG090W01S4	Complete	EOG090W01T1	Complete	EOG090W01XG	Complete
EOG090W01SD	Duplicated	EOG090W01T7	Complete	EOG090W01YB	Fragmented
EOG090W01SD	Duplicated	EOG090W01TY	Duplicated	EOG090W01YF	Fragmented
EOG090W01SD	Duplicated	EOG090W01TY	Duplicated	EOG090W01YP	Missing
EOG090W01SR	Complete	EOG090W01UN	Complete	EOG090W01YQ	Complete
EOG090W01SV	Complete	EOG090W01V1	Complete	EOG090W01YR	Complete
EOG090W01T1	Complete	EOG090W01VD	Complete	EOG090W01YS	Complete
EOG090W01T7	Complete	EOG090W01W5	Complete	EOG090W01ZE	Complete
EOG090W01TY	Complete	EOG090W01W9	Complete	EOG090W01ZK	Complete
EOG090W01UN	Complete	EOG090W01WI	Complete	EOG090W01ZN	Complete
EOG090W01V1	Complete	EOG090W01WT	Duplicated	EOG090W020B	Complete
EOG090W01VD	Complete	EOG090W01WT	Duplicated	EOG090W020X	Complete
EOG090W01W5	Complete	EOG090W01X2	Missing	EOG090W0216	Complete
EOG090W01W9	Complete	EOG090W01XB	Complete	EOG090W021Y	Complete
EOG090W01WI	Complete	EOG090W01XG	Fragmented	EOG090W0221	Complete
EOG090W01WT	Complete	EOG090W01YB	Complete	EOG090W0224	Complete
EOG090W01X2	Missing	EOG090W01YF	Complete	EOG090W0227	Complete
EOG090W01XB	Complete	EOG090W01YP	Fragmented	EOG090W022N	Complete
EOG090W01XG	Fragmented	EOG090W01YQ	Duplicated	EOG090W0230	Complete
EOG090W01YB	Fragmented	EOG090W01YQ	Duplicated	EOG090W023I	Duplicated
EOG090W01YF	Duplicated	EOG090W01YQ	Duplicated	EOG090W023I	Duplicated
EOG090W01YF	Duplicated	EOG090W01YR	Complete	EOG090W023J	Complete
EOG090W01YP	Missing	EOG090W01YS	Complete	EOG090W0241	Complete
EOG090W01YQ	Duplicated	EOG090W01ZE	Complete	EOG090W0248	Complete
EOG090W01YQ	Duplicated	EOG090W01ZK	Complete	EOG090W0271	Complete
EOG090W01YQ	Duplicated	EOG090W01ZN	Duplicated	EOG090W0275	Fragmented
EOG090W01YR	Complete	EOG090W01ZN	Duplicated	EOG090W027T	Complete
EOG090W01YS	Complete	EOG090W020B	Complete	EOG090W027V	Complete
EOG090W01ZE	Complete	EOG090W020X	Complete	EOG090W027X	Complete
EOG090W01ZK	Complete	EOG090W0216	Fragmented	EOG090W028J	Complete
EOG090W01ZN	Complete	EOG090W021Y	Complete	EOG090W028M	Complete
EOG090W020B	Complete	EOG090W0221	Complete	EOG090W028U	Complete
EOG090W020X	Complete	EOG090W0224	Complete	EOG090W0293	Complete
EOG090W0216	Complete	EOG090W0227	Fragmented	EOG090W029F	Complete
EOG090W021Y	Complete	EOG090W022N	Fragmented	EOG090W029L	Complete
EOG090W0221	Complete	EOG090W0230	Complete	EOG090W029M	Complete
EOG090W0224	Fragmented	EOG090W023I	Duplicated	EOG090W029Q	Complete
EOG090W0227	Fragmented	EOG090W023I	Duplicated	EOG090W029S	Complete
EOG090W022N	Fragmented	EOG090W023J	Complete	EOG090W029U	Complete
EOG090W0230	Complete	EOG090W0241	Complete	EOG090W02A7	Complete
EOG090W023I	Duplicated	EOG090W0248	Complete	EOG090W02AB	Complete
EOG090W023I	Duplicated	EOG090W0271	Duplicated	EOG090W02AE	Complete
EOG090W023J	Fragmented	EOG090W0271	Duplicated	EOG090W02AO	Complete
EOG090W0241	Complete	EOG090W0275	Fragmented	EOG090W02AS	Complete
EOG090W0248	Complete	EOG090W027T	Complete	EOG090W02AU	Complete
EOG090W0271	Duplicated	EOG090W027V	Complete	EOG090W02AZ	Complete
EOG090W0271	Duplicated	EOG090W027X	Complete	EOG090W02B1	Complete
EOG090W0275	Fragmented	EOG090W028J	Complete	EOG090W02B6	Complete
EOG090W027T	Duplicated	EOG090W028M	Complete	EOG090W02B7	Complete
EOG090W027T	Duplicated	EOG090W028U	Complete	EOG090W02B8	Complete
EOG090W027V	Complete	EOG090W0293	Complete	EOG090W02BE	Complete
EOG090W027X	Complete	EOG090W029F	Complete	EOG090W02BL	Complete
EOG090W028J	Complete	EOG090W029L	Complete	EOG090W02C1	Complete
EOG090W028M	Complete	EOG090W029M	Complete	EOG090W02C3	Complete
EOG090W028U	Complete	EOG090W029Q	Duplicated	EOG090W02C5	Missing
EOG090W0293	Complete	EOG090W029Q	Duplicated	EOG090W02CB	Fragmented
EOG090W029F	Complete	EOG090W029Q	Duplicated	EOG090W02CW	Complete
EOG090W029L	Duplicated	EOG090W029S	Complete	EOG090W02E8	Complete
EOG090W029L	Duplicated	EOG090W029U	Complete	EOG090W02EI	Complete
EOG090W029L	Duplicated	EOG090W02A7	Complete	EOG090W02EJ	Complete
EOG090W029M	Complete	EOG090W02AB	Complete	EOG090W02ET	Complete
EOG090W029Q	Duplicated	EOG090W02AE	Fragmented	EOG090W02FI	Complete
EOG090W029Q	Duplicated	EOG090W02AO	Complete	EOG090W02FJ	Complete
EOG090W029S	Complete	EOG090W02AS	Complete	EOG090W02FV	Complete
EOG090W029U	Complete	EOG090W02AU	Complete	EOG090W02H5	Complete
EOG090W02A7	Complete	EOG090W02AZ	Complete	EOG090W02H6	Complete
EOG090W02AB	Complete	EOG090W02B1	Complete	EOG090W02IA	Complete
EOG090W02AE	Fragmented	EOG090W02B6	Duplicated	EOG090W02JO	Complete
EOG090W02AO	Complete	EOG090W02B6	Duplicated	EOG090W02JW	Complete
EOG090W02AS	Duplicated	EOG090W02B6	Duplicated	EOG090W02JZ	Complete
EOG090W02AS	Duplicated	EOG090W02B7	Duplicated	EOG090W02KJ	Missing
EOG090W02AS	Duplicated	EOG090W02B7	Duplicated	EOG090W02KK	Fragmented
EOG090W02AU	Complete	EOG090W02B8	Complete	EOG090W02LH	Complete
EOG090W02AZ	Complete	EOG090W02BE	Complete	EOG090W02LK	Complete
EOG090W02B1	Complete	EOG090W02BL	Complete	EOG090W02LL	Fragmented
EOG090W02B6	Duplicated	EOG090W02C1	Complete	EOG090W02LX	Complete
EOG090W02B6	Duplicated	EOG090W02C3	Complete	EOG090W02M2	Fragmented
EOG090W02B7	Complete	EOG090W02C5	Missing	EOG090W02M7	Complete
EOG090W02B8	Complete	EOG090W02CB	Fragmented	EOG090W02O9	Complete
EOG090W02BE	Complete	EOG090W02CW	Complete	EOG090W02OH	Complete
EOG090W02BL	Complete	EOG090W02E8	Complete	EOG090W02OJ	Complete
EOG090W02C1	Complete	EOG090W02EI	Duplicated	EOG090W02OT	Complete
EOG090W02C3	Complete	EOG090W02EI	Duplicated	EOG090W02P7	Fragmented
EOG090W02C5	Missing	EOG090W02EI	Duplicated	EOG090W02PJ	Complete
EOG090W02CB	Fragmented	EOG090W02EJ	Complete	EOG090W02PN	Complete
EOG090W02CW	Complete	EOG090W02ET	Complete	EOG090W02Q5	Complete
EOG090W02E8	Complete	EOG090W02FI	Complete	EOG090W02Q7	Complete
EOG090W02EI	Duplicated	EOG090W02FJ	Complete	EOG090W02QT	Complete
EOG090W02EI	Duplicated	EOG090W02FV	Fragmented	EOG090W02RO	Complete
EOG090W02EI	Duplicated	EOG090W02H5	Complete	EOG090W02SB	Complete
EOG090W02EJ	Complete	EOG090W02H6	Duplicated	EOG090W02SR	Complete
EOG090W02ET	Complete	EOG090W02H6	Duplicated	EOG090W02T6	Fragmented
EOG090W02FI	Complete	EOG090W02IA	Fragmented	EOG090W02TI	Fragmented
EOG090W02FJ	Complete	EOG090W02JO	Fragmented	EOG090W02TM	Complete
EOG090W02FV	Complete	EOG090W02JW	Complete	EOG090W02TS	Complete
EOG090W02H5	Complete	EOG090W02JZ	Complete	EOG090W02TY	Complete
EOG090W02H6	Duplicated	EOG090W02KJ	Missing	EOG090W02UI	Complete
EOG090W02H6	Duplicated	EOG090W02KK	Fragmented	EOG090W02UP	Complete
EOG090W02IA	Fragmented	EOG090W02LH	Complete	EOG090W02UQ	Complete
EOG090W02JO	Fragmented	EOG090W02LK	Fragmented	EOG090W02US	Complete
EOG090W02JW	Complete	EOG090W02LL	Fragmented	EOG090W02UV	Complete
EOG090W02JZ	Complete	EOG090W02LX	Complete	EOG090W02V5	Complete
EOG090W02KJ	Missing	EOG090W02M2	Fragmented	EOG090W02VN	Complete
EOG090W02KK	Fragmented	EOG090W02M7	Complete	EOG090W02VP	Complete
EOG090W02LH	Complete	EOG090W02O9	Complete	EOG090W02WH	Complete
EOG090W02LK	Fragmented	EOG090W02OH	Complete	EOG090W02ZM	Complete
EOG090W02LL	Fragmented	EOG090W02OJ	Complete	EOG090W02ZU	Complete
EOG090W02LX	Complete	EOG090W02OT	Complete	EOG090W02ZZ	Complete
EOG090W02M2	Fragmented	EOG090W02P7	Fragmented	EOG090W030B	Complete
EOG090W02M7	Complete	EOG090W02PJ	Complete	EOG090W030U	Duplicated
EOG090W02O9	Complete	EOG090W02PN	Complete	EOG090W030U	Duplicated
EOG090W02OH	Complete	EOG090W02Q5	Complete	EOG090W0319	Complete
EOG090W02OJ	Complete	EOG090W02Q7	Fragmented	EOG090W0326	Fragmented
EOG090W02OT	Duplicated	EOG090W02QT	Complete	EOG090W032M	Missing
EOG090W02OT	Duplicated	EOG090W02RO	Complete	EOG090W032Z	Fragmented
EOG090W02P7	Fragmented	EOG090W02SB	Complete	EOG090W033T	Complete
EOG090W02PJ	Complete	EOG090W02SR	Complete	EOG090W033Y	Complete
EOG090W02PN	Complete	EOG090W02T6	Fragmented	EOG090W034V	Fragmented
EOG090W02Q5	Complete	EOG090W02TI	Fragmented	EOG090W034W	Complete
EOG090W02Q7	Fragmented	EOG090W02TM	Complete	EOG090W034Y	Complete
EOG090W02QT	Complete	EOG090W02TS	Complete	EOG090W0358	Complete
EOG090W02RO	Duplicated	EOG090W02TY	Complete	EOG090W035G	Complete
EOG090W02RO	Duplicated	EOG090W02UI	Fragmented	EOG090W035W	Complete
EOG090W02SB	Complete	EOG090W02UP	Complete	EOG090W0360	Complete
EOG090W02SR	Complete	EOG090W02UQ	Complete	EOG090W036J	Complete
EOG090W02T6	Fragmented	EOG090W02US	Duplicated	EOG090W036O	Complete
EOG090W02TI	Fragmented	EOG090W02US	Duplicated	EOG090W036S	Complete
EOG090W02TM	Complete	EOG090W02UV	Complete	EOG090W036T	Complete
EOG090W02TS	Complete	EOG090W02V5	Complete	EOG090W036Y	Complete
EOG090W02TY	Complete	EOG090W02VN	Complete	EOG090W036Z	Complete
EOG090W02UI	Complete	EOG090W02VP	Fragmented	EOG090W038B	Complete
EOG090W02UP	Complete	EOG090W02WH	Complete	EOG090W038Y	Complete
EOG090W02UQ	Complete	EOG090W02ZM	Complete	EOG090W038Z	Complete
EOG090W02US	Complete	EOG090W02ZU	Complete	EOG090W0390	Complete
EOG090W02UV	Complete	EOG090W02ZZ	Duplicated	EOG090W0394	Complete
EOG090W02V5	Complete	EOG090W02ZZ	Duplicated	EOG090W0395	Complete
EOG090W02VN	Complete	EOG090W02ZZ	Duplicated	EOG090W03A1	Complete
EOG090W02VP	Fragmented	EOG090W030B	Missing	EOG090W03A5	Complete
EOG090W02WH	Complete	EOG090W030U	Duplicated	EOG090W03A6	Complete
EOG090W02ZM	Complete	EOG090W030U	Duplicated	EOG090W03AD	Complete
EOG090W02ZU	Complete	EOG090W0319	Complete	EOG090W03AQ	Complete
EOG090W02ZZ	Complete	EOG090W0326	Fragmented	EOG090W03AV	Complete
EOG090W030B	Complete	EOG090W032M	Missing	EOG090W03CA	Complete
EOG090W030U	Duplicated	EOG090W032Z	Fragmented	EOG090W03CD	Complete
EOG090W030U	Duplicated	EOG090W033T	Fragmented	EOG090W03CT	Complete
EOG090W0319	Complete	EOG090W033Y	Complete	EOG090W03D1	Complete
EOG090W0326	Fragmented	EOG090W034V	Fragmented	EOG090W03DD	Complete
EOG090W032M	Missing	EOG090W034W	Complete	EOG090W03DE	Complete
EOG090W032Z	Fragmented	EOG090W034Y	Complete	EOG090W03DQ	Complete
EOG090W033T	Fragmented	EOG090W0358	Complete	EOG090W03DZ	Fragmented
EOG090W033Y	Complete	EOG090W035G	Complete	EOG090W03EA	Complete
EOG090W034V	Fragmented	EOG090W035W	Fragmented	EOG090W03EG	Complete
EOG090W034W	Complete	EOG090W0360	Complete	EOG090W03FA	Complete
EOG090W034Y	Complete	EOG090W036J	Fragmented	EOG090W03FN	Complete
EOG090W0358	Complete	EOG090W036O	Complete	EOG090W03GG	Duplicated
EOG090W035G	Complete	EOG090W036S	Complete	EOG090W03GG	Duplicated
EOG090W035W	Fragmented	EOG090W036T	Complete	EOG090W03GG	Duplicated
EOG090W0360	Fragmented	EOG090W036Y	Complete	EOG090W03GO	Complete
EOG090W036J	Complete	EOG090W036Z	Complete	EOG090W03GT	Complete
EOG090W036O	Missing	EOG090W038B	Complete	EOG090W03H4	Complete
EOG090W036S	Complete	EOG090W038Y	Complete	EOG090W03I4	Complete
EOG090W036T	Fragmented	EOG090W038Z	Complete	EOG090W03IB	Complete
EOG090W036Y	Complete	EOG090W0390	Complete	EOG090W03IM	Complete
EOG090W036Z	Complete	EOG090W0394	Duplicated	EOG090W03J2	Complete
EOG090W038B	Complete	EOG090W0394	Duplicated	EOG090W03J7	Complete
EOG090W038Y	Complete	EOG090W0394	Duplicated	EOG090W03JE	Complete
EOG090W038Z	Complete	EOG090W0395	Complete	EOG090W03JS	Complete
EOG090W0390	Complete	EOG090W03A1	Complete	EOG090W03JX	Complete
EOG090W0394	Complete	EOG090W03A5	Complete	EOG090W03K0	Complete
EOG090W0395	Complete	EOG090W03A6	Complete	EOG090W03KF	Complete
EOG090W03A1	Complete	EOG090W03AD	Complete	EOG090W03KT	Complete
EOG090W03A5	Complete	EOG090W03AQ	Fragmented	EOG090W03MT	Complete
EOG090W03A6	Complete	EOG090W03AV	Fragmented	EOG090W03N1	Complete
EOG090W03AD	Complete	EOG090W03CA	Complete	EOG090W03N7	Complete
EOG090W03AQ	Fragmented	EOG090W03CD	Duplicated	EOG090W03NG	Complete
EOG090W03AV	Fragmented	EOG090W03CD	Duplicated	EOG090W03NK	Complete
EOG090W03CA	Complete	EOG090W03CD	Duplicated	EOG090W03NQ	Missing
EOG090W03CD	Duplicated	EOG090W03CT	Complete	EOG090W03O0	Complete
EOG090W03CD	Duplicated	EOG090W03D1	Complete	EOG090W03P4	Complete
EOG090W03CD	Duplicated	EOG090W03DD	Complete	EOG090W03P8	Complete
EOG090W03CT	Complete	EOG090W03DE	Complete	EOG090W03PL	Complete
EOG090W03D1	Complete	EOG090W03DQ	Complete	EOG090W03Q8	Complete
EOG090W03DD	Fragmented	EOG090W03DZ	Fragmented	EOG090W03QD	Complete
EOG090W03DE	Complete	EOG090W03EA	Duplicated	EOG090W03R4	Complete
EOG090W03DQ	Complete	EOG090W03EA	Duplicated	EOG090W03RF	Missing
EOG090W03DZ	Fragmented	EOG090W03EG	Complete	EOG090W03RU	Complete
EOG090W03EA	Duplicated	EOG090W03FA	Fragmented	EOG090W03T1	Complete
EOG090W03EA	Duplicated	EOG090W03FN	Complete	EOG090W03T3	Complete
EOG090W03EG	Complete	EOG090W03GG	Duplicated	EOG090W03TK	Fragmented
EOG090W03FA	Fragmented	EOG090W03GG	Duplicated	EOG090W03TM	Complete
EOG090W03FN	Complete	EOG090W03GG	Duplicated	EOG090W03TN	Complete
EOG090W03GG	Duplicated	EOG090W03GO	Complete	EOG090W03TV	Complete
EOG090W03GG	Duplicated	EOG090W03GT	Duplicated	EOG090W03U2	Complete
EOG090W03GG	Duplicated	EOG090W03GT	Duplicated	EOG090W03U6	Complete
EOG090W03GO	Duplicated	EOG090W03GT	Duplicated	EOG090W03UR	Complete
EOG090W03GO	Duplicated	EOG090W03H4	Complete	EOG090W03UW	Complete
EOG090W03GT	Complete	EOG090W03I4	Complete	EOG090W03VK	Complete
EOG090W03H4	Complete	EOG090W03IB	Complete	EOG090W03WG	Complete
EOG090W03I4	Complete	EOG090W03IM	Complete	EOG090W03WQ	Complete
EOG090W03IB	Complete	EOG090W03J2	Duplicated	EOG090W03WS	Complete
EOG090W03IM	Complete	EOG090W03J2	Duplicated	EOG090W03WV	Complete
EOG090W03J2	Duplicated	EOG090W03J7	Complete	EOG090W03WY	Complete
EOG090W03J2	Duplicated	EOG090W03JE	Complete	EOG090W03XU	Complete
EOG090W03J7	Fragmented	EOG090W03JS	Complete	EOG090W03Y4	Complete
EOG090W03JE	Complete	EOG090W03JX	Complete	EOG090W03YR	Complete
EOG090W03JS	Complete	EOG090W03K0	Complete	EOG090W03ZR	Complete
EOG090W03JX	Complete	EOG090W03KF	Duplicated	EOG090W0402	Complete
EOG090W03K0	Complete	EOG090W03KF	Duplicated	EOG090W040V	Complete
EOG090W03KF	Complete	EOG090W03KF	Duplicated	EOG090W0417	Complete
EOG090W03KT	Complete	EOG090W03KT	Complete	EOG090W0427	Complete
EOG090W03MT	Complete	EOG090W03MT	Complete	EOG090W042A	Complete
EOG090W03N1	Complete	EOG090W03N1	Complete	EOG090W044V	Complete
EOG090W03N7	Complete	EOG090W03N7	Complete	EOG090W045N	Complete
EOG090W03NG	Complete	EOG090W03NG	Complete	EOG090W045P	Complete
EOG090W03NK	Complete	EOG090W03NK	Complete	EOG090W0463	Complete
EOG090W03NQ	Missing	EOG090W03NQ	Fragmented	EOG090W046G	Complete
EOG090W03O0	Complete	EOG090W03O0	Complete	EOG090W046O	Complete
EOG090W03P4	Complete	EOG090W03P4	Complete	EOG090W046P	Complete
EOG090W03P8	Complete	EOG090W03P8	Complete	EOG090W046Y	Complete
EOG090W03PL	Complete	EOG090W03PL	Duplicated	EOG090W0483	Complete
EOG090W03Q8	Complete	EOG090W03PL	Duplicated	EOG090W049V	Complete
EOG090W03QD	Complete	EOG090W03Q8	Complete	EOG090W04AM	Complete
EOG090W03R4	Fragmented	EOG090W03QD	Complete	EOG090W04BN	Complete
EOG090W03RF	Missing	EOG090W03R4	Fragmented	EOG090W04BS	Complete
EOG090W03RU	Complete	EOG090W03RF	Missing	EOG090W04C0	Missing
EOG090W03T1	Complete	EOG090W03RU	Complete	EOG090W04C8	Complete
EOG090W03T3	Complete	EOG090W03T1	Complete	EOG090W04C9	Complete
EOG090W03TK	Fragmented	EOG090W03T3	Complete	EOG090W04CA	Complete
EOG090W03TM	Fragmented	EOG090W03TK	Fragmented	EOG090W04CD	Complete
EOG090W03TN	Complete	EOG090W03TM	Complete	EOG090W04CS	Complete
EOG090W03TV	Complete	EOG090W03TN	Complete	EOG090W04D0	Complete
EOG090W03U2	Complete	EOG090W03TV	Complete	EOG090W04DG	Complete
EOG090W03U6	Complete	EOG090W03U2	Complete	EOG090W04DH	Complete
EOG090W03UR	Complete	EOG090W03U6	Complete	EOG090W04E0	Complete
EOG090W03UW	Complete	EOG090W03UR	Complete	EOG090W04FD	Complete
EOG090W03VK	Duplicated	EOG090W03UW	Complete	EOG090W04FE	Complete
EOG090W03VK	Duplicated	EOG090W03VK	Complete	EOG090W04G1	Complete
EOG090W03WG	Complete	EOG090W03WG	Complete	EOG090W04G2	Complete
EOG090W03WQ	Complete	EOG090W03WQ	Complete	EOG090W04G6	Missing
EOG090W03WS	Fragmented	EOG090W03WS	Fragmented	EOG090W04GI	Complete
EOG090W03WV	Complete	EOG090W03WV	Complete	EOG090W04GW	Complete
EOG090W03WY	Complete	EOG090W03WY	Duplicated	EOG090W04H1	Complete
EOG090W03XU	Duplicated	EOG090W03WY	Duplicated	EOG090W04HA	Complete
EOG090W03XU	Duplicated	EOG090W03XU	Complete	EOG090W04HB	Fragmented
EOG090W03Y4	Complete	EOG090W03Y4	Complete	EOG090W04HK	Complete
EOG090W03YR	Duplicated	EOG090W03YR	Complete	EOG090W04I2	Complete
EOG090W03YR	Duplicated	EOG090W03ZR	Complete	EOG090W04IF	Complete
EOG090W03YR	Duplicated	EOG090W0402	Complete	EOG090W04II	Complete
EOG090W03ZR	Complete	EOG090W040V	Complete	EOG090W04IJ	Fragmented
EOG090W0402	Complete	EOG090W0417	Complete	EOG090W04IL	Complete
EOG090W040V	Complete	EOG090W0427	Duplicated	EOG090W04IP	Complete
EOG090W0417	Complete	EOG090W0427	Duplicated	EOG090W04JM	Complete
EOG090W0427	Duplicated	EOG090W042A	Fragmented	EOG090W04JO	Complete
EOG090W0427	Duplicated	EOG090W044V	Complete	EOG090W04JP	Complete
EOG090W042A	Fragmented	EOG090W045N	Complete	EOG090W04JS	Complete
EOG090W044V	Complete	EOG090W045P	Complete	EOG090W04KJ	Complete
EOG090W045N	Complete	EOG090W0463	Duplicated	EOG090W04LC	Duplicated
EOG090W045P	Fragmented	EOG090W0463	Duplicated	EOG090W04LC	Duplicated
EOG090W0463	Duplicated	EOG090W046G	Fragmented	EOG090W04LC	Duplicated
EOG090W0463	Duplicated	EOG090W046O	Complete	EOG090W04LU	Complete
EOG090W046G	Fragmented	EOG090W046P	Duplicated	EOG090W04ME	Complete
EOG090W046O	Complete	EOG090W046P	Duplicated	EOG090W04N5	Complete
EOG090W046P	Complete	EOG090W046Y	Complete	EOG090W04NK	Complete
EOG090W046Y	Duplicated	EOG090W0483	Fragmented	EOG090W04NQ	Complete
EOG090W046Y	Duplicated	EOG090W049V	Complete	EOG090W04NU	Complete
EOG090W0483	Fragmented	EOG090W04AM	Complete	EOG090W04O1	Fragmented
EOG090W049V	Complete	EOG090W04BN	Fragmented	EOG090W04O6	Complete
EOG090W04AM	Complete	EOG090W04BS	Duplicated	EOG090W04OJ	Complete
EOG090W04BN	Fragmented	EOG090W04BS	Duplicated	EOG090W04OT	Fragmented
EOG090W04BS	Duplicated	EOG090W04C0	Missing	EOG090W04OX	Complete
EOG090W04BS	Duplicated	EOG090W04C8	Duplicated	EOG090W04PC	Complete
EOG090W04C0	Missing	EOG090W04C8	Duplicated	EOG090W04PI	Complete
EOG090W04C8	Duplicated	EOG090W04C9	Complete	EOG090W04PV	Complete
EOG090W04C8	Duplicated	EOG090W04CA	Complete	EOG090W04QF	Complete
EOG090W04C9	Missing	EOG090W04CD	Complete	EOG090W04QG	Duplicated
EOG090W04CA	Complete	EOG090W04CS	Complete	EOG090W04QG	Duplicated
EOG090W04CD	Complete	EOG090W04D0	Fragmented	EOG090W04RF	Missing
EOG090W04CS	Complete	EOG090W04DG	Complete	EOG090W04RT	Complete
EOG090W04D0	Complete	EOG090W04DH	Complete	EOG090W04SK	Complete
EOG090W04DG	Complete	EOG090W04E0	Complete	EOG090W04SL	Complete
EOG090W04DH	Complete	EOG090W04FD	Complete	EOG090W04TK	Complete
EOG090W04E0	Complete	EOG090W04FE	Complete	EOG090W04U4	Complete
EOG090W04FD	Complete	EOG090W04G1	Complete	EOG090W04UC	Complete
EOG090W04FE	Complete	EOG090W04G2	Complete	EOG090W04UI	Complete
EOG090W04G1	Complete	EOG090W04G6	Missing	EOG090W04VT	Complete
EOG090W04G2	Complete	EOG090W04GI	Complete	EOG090W04XE	Complete
EOG090W04G6	Missing	EOG090W04GW	Complete	EOG090W04XG	Fragmented
EOG090W04GI	Complete	EOG090W04H1	Duplicated	EOG090W04XH	Complete
EOG090W04GW	Complete	EOG090W04H1	Duplicated	EOG090W04XO	Complete
EOG090W04H1	Complete	EOG090W04HA	Complete	EOG090W04XS	Complete
EOG090W04HA	Complete	EOG090W04HB	Fragmented	EOG090W04YD	Complete
EOG090W04HB	Fragmented	EOG090W04HK	Complete	EOG090W04YF	Complete
EOG090W04HK	Complete	EOG090W04I2	Complete	EOG090W04ZL	Complete
EOG090W04I2	Complete	EOG090W04IF	Complete	EOG090W04ZO	Complete
EOG090W04IF	Duplicated	EOG090W04II	Duplicated	EOG090W050G	Complete
EOG090W04IF	Duplicated	EOG090W04II	Duplicated	EOG090W050J	Complete
EOG090W04II	Duplicated	EOG090W04II	Duplicated	EOG090W050K	Fragmented
EOG090W04II	Duplicated	EOG090W04IJ	Missing	EOG090W050Y	Complete
EOG090W04II	Duplicated	EOG090W04IL	Complete	EOG090W0515	Complete
EOG090W04IJ	Missing	EOG090W04IP	Complete	EOG090W051H	Complete
EOG090W04IL	Complete	EOG090W04JM	Complete	EOG090W051T	Complete
EOG090W04IP	Duplicated	EOG090W04JO	Complete	EOG090W051U	Complete
EOG090W04IP	Duplicated	EOG090W04JP	Fragmented	EOG090W052U	Complete
EOG090W04IP	Duplicated	EOG090W04JS	Complete	EOG090W053Z	Complete
EOG090W04JM	Duplicated	EOG090W04KJ	Fragmented	EOG090W0540	Complete
EOG090W04JM	Duplicated	EOG090W04LC	Complete	EOG090W054N	Fragmented
EOG090W04JO	Complete	EOG090W04LU	Complete	EOG090W054P	Complete
EOG090W04JP	Fragmented	EOG090W04ME	Duplicated	EOG090W055D	Complete
EOG090W04JS	Duplicated	EOG090W04ME	Duplicated	EOG090W055F	Complete
EOG090W04JS	Duplicated	EOG090W04N5	Complete	EOG090W0577	Complete
EOG090W04KJ	Fragmented	EOG090W04NK	Complete	EOG090W057P	Complete
EOG090W04LC	Duplicated	EOG090W04NQ	Complete	EOG090W057Z	Complete
EOG090W04LC	Duplicated	EOG090W04NU	Complete	EOG090W0585	Complete
EOG090W04LC	Duplicated	EOG090W04O1	Complete	EOG090W058B	Complete
EOG090W04LC	Duplicated	EOG090W04O6	Complete	EOG090W059K	Complete
EOG090W04LU	Complete	EOG090W04OJ	Complete	EOG090W05AL	Duplicated
EOG090W04ME	Duplicated	EOG090W04OT	Fragmented	EOG090W05AL	Duplicated
EOG090W04ME	Duplicated	EOG090W04OX	Fragmented	EOG090W05AL	Duplicated
EOG090W04N5	Complete	EOG090W04PC	Fragmented	EOG090W05AQ	Complete
EOG090W04NK	Complete	EOG090W04PI	Complete	EOG090W05B1	Complete
EOG090W04NQ	Complete	EOG090W04PV	Complete	EOG090W05BJ	Complete
EOG090W04NU	Complete	EOG090W04QF	Complete	EOG090W05C1	Complete
EOG090W04O1	Fragmented	EOG090W04QG	Complete	EOG090W05CF	Complete
EOG090W04O6	Complete	EOG090W04RF	Missing	EOG090W05CQ	Complete
EOG090W04OJ	Complete	EOG090W04RT	Complete	EOG090W05D8	Complete
EOG090W04OT	Fragmented	EOG090W04SK	Missing	EOG090W05DF	Complete
EOG090W04OX	Fragmented	EOG090W04SL	Complete	EOG090W05E6	Complete
EOG090W04PC	Complete	EOG090W04TK	Complete	EOG090W05E8	Duplicated
EOG090W04PI	Complete	EOG090W04U4	Complete	EOG090W05E8	Duplicated
EOG090W04PV	Complete	EOG090W04UC	Duplicated	EOG090W05EA	Complete
EOG090W04QF	Complete	EOG090W04UC	Duplicated	EOG090W05EV	Complete
EOG090W04QG	Complete	EOG090W04UI	Fragmented	EOG090W05EW	Complete
EOG090W04RF	Missing	EOG090W04VT	Complete	EOG090W05FT	Complete
EOG090W04RT	Complete	EOG090W04XE	Complete	EOG090W05FW	Duplicated
EOG090W04SK	Missing	EOG090W04XG	Complete	EOG090W05FW	Duplicated
EOG090W04SL	Complete	EOG090W04XH	Complete	EOG090W05FW	Duplicated
EOG090W04TK	Complete	EOG090W04XO	Complete	EOG090W05GI	Fragmented
EOG090W04U4	Complete	EOG090W04XS	Fragmented	EOG090W05GM	Complete
EOG090W04UC	Complete	EOG090W04YD	Duplicated	EOG090W05GS	Complete
EOG090W04UI	Fragmented	EOG090W04YD	Duplicated	EOG090W05GW	Complete
EOG090W04VT	Complete	EOG090W04YD	Duplicated	EOG090W05GY	Complete
EOG090W04XE	Complete	EOG090W04YF	Complete	EOG090W05HI	Complete
EOG090W04XG	Complete	EOG090W04ZL	Complete	EOG090W05IA	Complete
EOG090W04XH	Complete	EOG090W04ZO	Complete	EOG090W05IO	Complete
EOG090W04XO	Complete	EOG090W050G	Complete	EOG090W05K4	Complete
EOG090W04XS	Complete	EOG090W050J	Complete	EOG090W05KO	Complete
EOG090W04YD	Duplicated	EOG090W050K	Fragmented	EOG090W05KY	Complete
EOG090W04YD	Duplicated	EOG090W050Y	Complete	EOG090W05KZ	Complete
EOG090W04YD	Duplicated	EOG090W0515	Complete	EOG090W05LG	Complete
EOG090W04YF	Complete	EOG090W051H	Complete	EOG090W05LO	Complete
EOG090W04ZL	Complete	EOG090W051T	Complete	EOG090W05MI	Complete
EOG090W04ZO	Complete	EOG090W051U	Complete	EOG090W05MU	Complete
EOG090W050G	Complete	EOG090W052U	Duplicated	EOG090W05MZ	Complete
EOG090W050J	Complete	EOG090W052U	Duplicated	EOG090W05N0	Complete
EOG090W050K	Fragmented	EOG090W052U	Duplicated	EOG090W05NZ	Complete
EOG090W050Y	Complete	EOG090W053Z	Complete	EOG090W05ON	Complete
EOG090W0515	Duplicated	EOG090W0540	Complete	EOG090W05PC	Complete
EOG090W0515	Duplicated	EOG090W054N	Fragmented	EOG090W05PN	Complete
EOG090W051H	Complete	EOG090W054P	Fragmented	EOG090W05PQ	Complete
EOG090W051T	Complete	EOG090W055D	Complete	EOG090W05QT	Complete
EOG090W051U	Complete	EOG090W055F	Complete	EOG090W05R4	Complete
EOG090W052U	Complete	EOG090W0577	Complete	EOG090W05RR	Complete
EOG090W053Z	Complete	EOG090W057P	Complete	EOG090W05S0	Complete
EOG090W0540	Complete	EOG090W057Z	Complete	EOG090W05U3	Complete
EOG090W054N	Fragmented	EOG090W0585	Complete	EOG090W05U4	Complete
EOG090W054P	Fragmented	EOG090W058B	Duplicated	EOG090W05V2	Complete
EOG090W055D	Duplicated	EOG090W058B	Duplicated	EOG090W05VB	Complete
EOG090W055D	Duplicated	EOG090W059K	Complete	EOG090W05VF	Complete
EOG090W055F	Fragmented	EOG090W05AL	Complete	EOG090W05VI	Complete
EOG090W0577	Complete	EOG090W05AQ	Complete	EOG090W05VV	Complete
EOG090W057P	Duplicated	EOG090W05B1	Complete	EOG090W05VW	Complete
EOG090W057P	Duplicated	EOG090W05BJ	Complete	EOG090W05WF	Complete
EOG090W057Z	Complete	EOG090W05C1	Complete	EOG090W05WH	Complete
EOG090W0585	Complete	EOG090W05CF	Complete	EOG090W05X8	Fragmented
EOG090W058B	Complete	EOG090W05CQ	Duplicated	EOG090W05XD	Complete
EOG090W059K	Complete	EOG090W05CQ	Duplicated	EOG090W05XM	Complete
EOG090W05AL	Complete	EOG090W05D8	Complete	EOG090W05XP	Complete
EOG090W05AQ	Fragmented	EOG090W05DF	Complete	EOG090W05XX	Complete
EOG090W05B1	Complete	EOG090W05E6	Complete	EOG090W05YR	Complete
EOG090W05BJ	Duplicated	EOG090W05E8	Complete	EOG090W05YU	Fragmented
EOG090W05BJ	Duplicated	EOG090W05EA	Complete	EOG090W05ZG	Complete
EOG090W05C1	Complete	EOG090W05EV	Complete	EOG090W05ZP	Complete
EOG090W05CF	Complete	EOG090W05EW	Complete	EOG090W05ZS	Duplicated
EOG090W05CQ	Complete	EOG090W05FT	Complete	EOG090W05ZS	Duplicated
EOG090W05D8	Complete	EOG090W05FW	Duplicated	EOG090W060L	Complete
EOG090W05DF	Complete	EOG090W05FW	Duplicated	EOG090W060T	Complete
EOG090W05E6	Complete	EOG090W05FW	Duplicated	EOG090W0611	Fragmented
EOG090W05E8	Complete	EOG090W05GI	Fragmented	EOG090W0612	Missing
EOG090W05EA	Complete	EOG090W05GM	Complete	EOG090W0618	Complete
EOG090W05EV	Complete	EOG090W05GS	Complete	EOG090W061C	Duplicated
EOG090W05EW	Complete	EOG090W05GW	Complete	EOG090W061C	Duplicated
EOG090W05FT	Complete	EOG090W05GY	Missing	EOG090W061O	Complete
EOG090W05FW	Duplicated	EOG090W05HI	Complete	EOG090W0621	Complete
EOG090W05FW	Duplicated	EOG090W05IA	Complete	EOG090W062I	Complete
EOG090W05FW	Duplicated	EOG090W05IO	Complete	EOG090W063H	Duplicated
EOG090W05GI	Fragmented	EOG090W05K4	Complete	EOG090W063H	Duplicated
EOG090W05GM	Complete	EOG090W05KO	Complete	EOG090W063H	Duplicated
EOG090W05GS	Complete	EOG090W05KY	Complete	EOG090W063Z	Complete
EOG090W05GW	Complete	EOG090W05KZ	Complete	EOG090W064A	Fragmented
EOG090W05GY	Missing	EOG090W05LG	Complete	EOG090W064P	Complete
EOG090W05HI	Complete	EOG090W05LO	Complete	EOG090W0657	Complete
EOG090W05IA	Complete	EOG090W05MI	Complete	EOG090W065B	Missing
EOG090W05IO	Complete	EOG090W05MU	Complete	EOG090W065D	Complete
EOG090W05K4	Complete	EOG090W05MZ	Complete	EOG090W065J	Complete
EOG090W05KO	Complete	EOG090W05N0	Complete	EOG090W065K	Complete
EOG090W05KY	Complete	EOG090W05NZ	Duplicated	EOG090W065M	Complete
EOG090W05KZ	Complete	EOG090W05NZ	Duplicated	EOG090W065X	Complete
EOG090W05LG	Complete	EOG090W05ON	Fragmented	EOG090W067A	Complete
EOG090W05LO	Complete	EOG090W05PC	Complete	EOG090W0692	Complete
EOG090W05MI	Complete	EOG090W05PN	Complete	EOG090W06A3	Complete
EOG090W05MU	Complete	EOG090W05PQ	Complete	EOG090W06A7	Complete
EOG090W05MZ	Complete	EOG090W05QT	Complete	EOG090W06A9	Complete
EOG090W05N0	Complete	EOG090W05R4	Complete	EOG090W06AG	Complete
EOG090W05NZ	Duplicated	EOG090W05RR	Fragmented	EOG090W06AN	Complete
EOG090W05NZ	Duplicated	EOG090W05S0	Complete	EOG090W06AU	Complete
EOG090W05ON	Complete	EOG090W05U3	Complete	EOG090W06CA	Complete
EOG090W05PC	Complete	EOG090W05U4	Duplicated	EOG090W06CJ	Complete
EOG090W05PN	Complete	EOG090W05U4	Duplicated	EOG090W06CL	Complete
EOG090W05PQ	Complete	EOG090W05V2	Fragmented	EOG090W06CO	Complete
EOG090W05QT	Complete	EOG090W05VB	Complete	EOG090W06CP	Complete
EOG090W05R4	Complete	EOG090W05VF	Complete	EOG090W06CS	Complete
EOG090W05RR	Fragmented	EOG090W05VI	Complete	EOG090W06DJ	Fragmented
EOG090W05S0	Complete	EOG090W05VV	Complete	EOG090W06DO	Fragmented
EOG090W05U3	Duplicated	EOG090W05VW	Complete	EOG090W06DS	Complete
EOG090W05U3	Duplicated	EOG090W05WF	Complete	EOG090W06E6	Complete
EOG090W05U4	Duplicated	EOG090W05WH	Complete	EOG090W06EC	Complete
EOG090W05U4	Duplicated	EOG090W05X8	Fragmented	EOG090W06FJ	Complete
EOG090W05V2	Fragmented	EOG090W05XD	Complete	EOG090W06FL	Complete
EOG090W05VB	Complete	EOG090W05XM	Fragmented	EOG090W06G6	Complete
EOG090W05VF	Fragmented	EOG090W05XP	Duplicated	EOG090W06GJ	Complete
EOG090W05VI	Complete	EOG090W05XP	Duplicated	EOG090W06GO	Complete
EOG090W05VV	Complete	EOG090W05XX	Complete	EOG090W06HM	Fragmented
EOG090W05VW	Complete	EOG090W05YR	Complete	EOG090W06HO	Complete
EOG090W05WF	Complete	EOG090W05YU	Fragmented	EOG090W06HU	Duplicated
EOG090W05WH	Complete	EOG090W05ZG	Fragmented	EOG090W06HU	Duplicated
EOG090W05X8	Fragmented	EOG090W05ZP	Complete	EOG090W06IC	Fragmented
EOG090W05XD	Complete	EOG090W05ZS	Duplicated	EOG090W06IG	Complete
EOG090W05XM	Fragmented	EOG090W05ZS	Duplicated	EOG090W06J5	Complete
EOG090W05XP	Duplicated	EOG090W060L	Complete	EOG090W06J6	Complete
EOG090W05XP	Duplicated	EOG090W060T	Complete	EOG090W06J7	Complete
EOG090W05XX	Complete	EOG090W0611	Fragmented	EOG090W06J9	Complete
EOG090W05YR	Complete	EOG090W0612	Missing	EOG090W06KM	Complete
EOG090W05YU	Complete	EOG090W0618	Complete	EOG090W06LM	Complete
EOG090W05ZG	Fragmented	EOG090W061C	Complete	EOG090W06LO	Complete
EOG090W05ZP	Complete	EOG090W061O	Fragmented	EOG090W06LR	Complete
EOG090W05ZS	Duplicated	EOG090W0621	Complete	EOG090W06M2	Duplicated
EOG090W05ZS	Duplicated	EOG090W062I	Complete	EOG090W06M2	Duplicated
EOG090W060L	Complete	EOG090W063H	Duplicated	EOG090W06MC	Complete
EOG090W060T	Complete	EOG090W063H	Duplicated	EOG090W06MS	Fragmented
EOG090W0611	Fragmented	EOG090W063Z	Complete	EOG090W06N6	Fragmented
EOG090W0612	Missing	EOG090W064A	Fragmented	EOG090W06NA	Complete
EOG090W0618	Complete	EOG090W064P	Complete	EOG090W06O1	Complete
EOG090W061C	Complete	EOG090W0657	Complete	EOG090W06OD	Complete
EOG090W061O	Fragmented	EOG090W065B	Missing	EOG090W06OE	Complete
EOG090W0621	Complete	EOG090W065D	Fragmented	EOG090W06OO	Missing
EOG090W062I	Complete	EOG090W065J	Fragmented	EOG090W06OS	Complete
EOG090W063H	Duplicated	EOG090W065K	Complete	EOG090W06OY	Complete
EOG090W063H	Duplicated	EOG090W065M	Complete	EOG090W06P2	Missing
EOG090W063Z	Complete	EOG090W065X	Complete	EOG090W06P5	Complete
EOG090W064A	Fragmented	EOG090W067A	Complete	EOG090W06PJ	Complete
EOG090W064P	Complete	EOG090W0692	Complete	EOG090W06PP	Complete
EOG090W0657	Complete	EOG090W06A3	Complete	EOG090W06PR	Complete
EOG090W065B	Missing	EOG090W06A7	Complete	EOG090W06PW	Complete
EOG090W065D	Fragmented	EOG090W06A9	Fragmented	EOG090W06PY	Fragmented
EOG090W065J	Fragmented	EOG090W06AG	Complete	EOG090W06QR	Complete
EOG090W065K	Complete	EOG090W06AN	Complete	EOG090W06S4	Complete
EOG090W065M	Complete	EOG090W06AU	Complete	EOG090W06T7	Complete
EOG090W065X	Complete	EOG090W06CA	Complete	EOG090W06TC	Complete
EOG090W067A	Complete	EOG090W06CJ	Complete	EOG090W06US	Complete
EOG090W0692	Complete	EOG090W06CL	Complete	EOG090W06UT	Complete
EOG090W06A3	Complete	EOG090W06CO	Complete	EOG090W06UV	Complete
EOG090W06A7	Complete	EOG090W06CP	Complete	EOG090W06V6	Complete
EOG090W06A9	Fragmented	EOG090W06CS	Complete	EOG090W06VA	Duplicated
EOG090W06AG	Complete	EOG090W06DJ	Fragmented	EOG090W06VA	Duplicated
EOG090W06AN	Complete	EOG090W06DO	Complete	EOG090W06VF	Complete
EOG090W06AU	Complete	EOG090W06DS	Fragmented	EOG090W06VZ	Complete
EOG090W06CA	Complete	EOG090W06E6	Complete	EOG090W06W8	Complete
EOG090W06CJ	Complete	EOG090W06EC	Complete	EOG090W06WJ	Complete
EOG090W06CL	Complete	EOG090W06FJ	Complete	EOG090W06WN	Complete
EOG090W06CO	Complete	EOG090W06FL	Complete	EOG090W06WT	Complete
EOG090W06CP	Complete	EOG090W06G6	Fragmented	EOG090W06X2	Complete
EOG090W06CS	Complete	EOG090W06GJ	Complete	EOG090W06X4	Complete
EOG090W06DJ	Fragmented	EOG090W06GO	Complete	EOG090W06XL	Complete
EOG090W06DO	Fragmented	EOG090W06HM	Fragmented	EOG090W06Y3	Fragmented
EOG090W06DS	Fragmented	EOG090W06HO	Complete	EOG090W06Y4	Complete
EOG090W06E6	Complete	EOG090W06HU	Duplicated	EOG090W06ZM	Complete
EOG090W06EC	Complete	EOG090W06HU	Duplicated	EOG090W06ZV	Complete
EOG090W06FJ	Complete	EOG090W06IC	Fragmented	EOG090W0707	Complete
EOG090W06FL	Complete	EOG090W06IG	Complete	EOG090W070D	Complete
EOG090W06G6	Complete	EOG090W06J5	Complete	EOG090W070Z	Fragmented
EOG090W06GJ	Complete	EOG090W06J6	Fragmented	EOG090W0716	Complete
EOG090W06GO	Complete	EOG090W06J7	Complete	EOG090W0717	Complete
EOG090W06HM	Fragmented	EOG090W06J9	Complete	EOG090W0721	Complete
EOG090W06HO	Complete	EOG090W06KM	Complete	EOG090W0722	Complete
EOG090W06HU	Duplicated	EOG090W06LM	Complete	EOG090W072I	Complete
EOG090W06HU	Duplicated	EOG090W06LO	Complete	EOG090W072J	Missing
EOG090W06IC	Fragmented	EOG090W06LR	Complete	EOG090W072L	Complete
EOG090W06IG	Complete	EOG090W06M2	Duplicated	EOG090W072N	Complete
EOG090W06J5	Complete	EOG090W06M2	Duplicated	EOG090W073M	Complete
EOG090W06J6	Complete	EOG090W06MC	Complete	EOG090W073W	Complete
EOG090W06J7	Complete	EOG090W06MS	Fragmented	EOG090W074X	Complete
EOG090W06J9	Complete	EOG090W06N6	Fragmented	EOG090W0753	Complete
EOG090W06KM	Complete	EOG090W06NA	Duplicated	EOG090W076L	Complete
EOG090W06LM	Complete	EOG090W06NA	Duplicated	EOG090W076M	Complete
EOG090W06LO	Complete	EOG090W06O1	Complete	EOG090W077C	Complete
EOG090W06LR	Complete	EOG090W06OD	Complete	EOG090W077F	Complete
EOG090W06M2	Duplicated	EOG090W06OE	Complete	EOG090W077G	Complete
EOG090W06M2	Duplicated	EOG090W06OO	Missing	EOG090W077R	Complete
EOG090W06M2	Duplicated	EOG090W06OS	Complete	EOG090W078A	Complete
EOG090W06MC	Complete	EOG090W06OY	Complete	EOG090W078C	Fragmented
EOG090W06MS	Fragmented	EOG090W06P2	Missing	EOG090W078H	Complete
EOG090W06N6	Fragmented	EOG090W06P5	Complete	EOG090W0795	Complete
EOG090W06NA	Duplicated	EOG090W06PJ	Complete	EOG090W0797	Complete
EOG090W06NA	Duplicated	EOG090W06PP	Duplicated	EOG090W079M	Complete
EOG090W06NA	Duplicated	EOG090W06PP	Duplicated	EOG090W07A3	Complete
EOG090W06O1	Complete	EOG090W06PR	Complete	EOG090W07BG	Complete
EOG090W06OD	Complete	EOG090W06PW	Complete	EOG090W07BL	Complete
EOG090W06OE	Complete	EOG090W06PY	Fragmented	EOG090W07BP	Complete
EOG090W06OO	Missing	EOG090W06QR	Complete	EOG090W07BQ	Complete
EOG090W06OS	Complete	EOG090W06S4	Duplicated	EOG090W07BX	Complete
EOG090W06OY	Complete	EOG090W06S4	Duplicated	EOG090W07CG	Complete
EOG090W06P2	Missing	EOG090W06S4	Duplicated	EOG090W07DE	Complete
EOG090W06P5	Complete	EOG090W06T7	Complete	EOG090W07DQ	Fragmented
EOG090W06PJ	Complete	EOG090W06TC	Complete	EOG090W07DX	Complete
EOG090W06PP	Complete	EOG090W06US	Complete	EOG090W07E5	Complete
EOG090W06PR	Complete	EOG090W06UT	Complete	EOG090W07E9	Complete
EOG090W06PW	Complete	EOG090W06UV	Complete	EOG090W07EX	Complete
EOG090W06PY	Fragmented	EOG090W06V6	Complete	EOG090W07F6	Complete
EOG090W06QR	Complete	EOG090W06VA	Complete	EOG090W07FZ	Complete
EOG090W06S4	Duplicated	EOG090W06VF	Duplicated	EOG090W07G3	Complete
EOG090W06S4	Duplicated	EOG090W06VF	Duplicated	EOG090W07G5	Complete
EOG090W06S4	Duplicated	EOG090W06VZ	Complete	EOG090W07GR	Fragmented
EOG090W06T7	Complete	EOG090W06W8	Complete	EOG090W07HB	Complete
EOG090W06TC	Complete	EOG090W06WJ	Complete	EOG090W07HU	Complete
EOG090W06US	Complete	EOG090W06WN	Complete	EOG090W07HX	Fragmented
EOG090W06UT	Complete	EOG090W06WT	Duplicated	EOG090W07IN	Complete
EOG090W06UV	Complete	EOG090W06WT	Duplicated	EOG090W07IX	Complete
EOG090W06V6	Complete	EOG090W06X2	Complete	EOG090W07J5	Complete
EOG090W06VA	Complete	EOG090W06X4	Complete	EOG090W07JI	Complete
EOG090W06VF	Duplicated	EOG090W06XL	Complete	EOG090W07JL	Complete
EOG090W06VF	Duplicated	EOG090W06Y3	Fragmented	EOG090W07KB	Complete
EOG090W06VZ	Complete	EOG090W06Y4	Complete	EOG090W07KX	Fragmented
EOG090W06W8	Complete	EOG090W06ZM	Complete	EOG090W07LR	Fragmented
EOG090W06WJ	Complete	EOG090W06ZV	Complete	EOG090W07M6	Complete
EOG090W06WN	Complete	EOG090W0707	Complete	EOG090W07MD	Complete
EOG090W06WT	Duplicated	EOG090W070D	Complete	EOG090W07MQ	Complete
EOG090W06WT	Duplicated	EOG090W070Z	Fragmented	EOG090W07MY	Complete
EOG090W06X2	Complete	EOG090W0716	Complete	EOG090W07N7	Complete
EOG090W06X4	Complete	EOG090W0717	Complete	EOG090W07N9	Fragmented
EOG090W06XL	Complete	EOG090W0721	Complete	EOG090W07NX	Complete
EOG090W06Y3	Fragmented	EOG090W0722	Complete	EOG090W07NY	Fragmented
EOG090W06Y4	Complete	EOG090W072I	Complete	EOG090W07O3	Complete
EOG090W06ZM	Complete	EOG090W072J	Missing	EOG090W07O8	Complete
EOG090W06ZV	Complete	EOG090W072L	Complete	EOG090W07OF	Complete
EOG090W0707	Complete	EOG090W072N	Complete	EOG090W07OI	Complete
EOG090W070D	Complete	EOG090W073M	Complete	EOG090W07OV	Complete
EOG090W070Z	Fragmented	EOG090W073W	Duplicated	EOG090W07OW	Complete
EOG090W0716	Complete	EOG090W073W	Duplicated	EOG090W07P9	Complete
EOG090W0717	Complete	EOG090W074X	Complete	EOG090W07PH	Complete
EOG090W0721	Complete	EOG090W0753	Complete	EOG090W07PK	Complete
EOG090W0722	Complete	EOG090W076L	Duplicated	EOG090W07PX	Complete
EOG090W072I	Fragmented	EOG090W076L	Duplicated	EOG090W07QX	Complete
EOG090W072J	Missing	EOG090W076M	Complete	EOG090W07RI	Complete
EOG090W072L	Complete	EOG090W077C	Duplicated	EOG090W07RR	Fragmented
EOG090W072N	Complete	EOG090W077C	Duplicated	EOG090W07RT	Complete
EOG090W073M	Complete	EOG090W077F	Complete	EOG090W07RU	Complete
EOG090W073W	Duplicated	EOG090W077G	Fragmented	EOG090W07RY	Complete
EOG090W073W	Duplicated	EOG090W077R	Complete	EOG090W07S7	Complete
EOG090W074X	Duplicated	EOG090W078A	Complete	EOG090W07S8	Complete
EOG090W074X	Duplicated	EOG090W078C	Fragmented	EOG090W07SE	Complete
EOG090W074X	Duplicated	EOG090W078H	Complete	EOG090W07TH	Complete
EOG090W0753	Complete	EOG090W0795	Complete	EOG090W07TI	Complete
EOG090W076L	Duplicated	EOG090W0797	Complete	EOG090W07TZ	Complete
EOG090W076L	Duplicated	EOG090W079M	Complete	EOG090W07VM	Complete
EOG090W076M	Complete	EOG090W07A3	Complete	EOG090W07WT	Complete
EOG090W077C	Complete	EOG090W07BG	Duplicated	EOG090W07WV	Complete
EOG090W077F	Complete	EOG090W07BG	Duplicated	EOG090W07X1	Complete
EOG090W077G	Fragmented	EOG090W07BG	Duplicated	EOG090W07XK	Complete
EOG090W077R	Complete	EOG090W07BL	Complete	EOG090W07XP	Complete
EOG090W078A	Complete	EOG090W07BP	Complete	EOG090W07XZ	Complete
EOG090W078C	Fragmented	EOG090W07BQ	Complete	EOG090W07YY	Complete
EOG090W078H	Complete	EOG090W07BX	Complete	EOG090W07Z2	Complete
EOG090W0795	Complete	EOG090W07CG	Complete	EOG090W07ZG	Complete
EOG090W0797	Complete	EOG090W07DE	Complete	EOG090W0800	Complete
EOG090W079M	Complete	EOG090W07DQ	Fragmented	EOG090W0803	Complete
EOG090W07A3	Complete	EOG090W07DX	Complete	EOG090W080B	Complete
EOG090W07BG	Duplicated	EOG090W07E5	Fragmented	EOG090W080Z	Complete
EOG090W07BG	Duplicated	EOG090W07E9	Complete	EOG090W081Z	Complete
EOG090W07BG	Duplicated	EOG090W07EX	Complete	EOG090W0828	Complete
EOG090W07BL	Complete	EOG090W07F6	Complete	EOG090W082E	Complete
EOG090W07BP	Complete	EOG090W07FZ	Complete	EOG090W082H	Complete
EOG090W07BQ	Complete	EOG090W07G3	Complete	EOG090W084I	Complete
EOG090W07BX	Complete	EOG090W07G5	Complete	EOG090W085S	Complete
EOG090W07CG	Fragmented	EOG090W07GR	Fragmented	EOG090W0864	Complete
EOG090W07DE	Complete	EOG090W07HB	Complete	EOG090W0865	Complete
EOG090W07DQ	Fragmented	EOG090W07HU	Complete	EOG090W0869	Complete
EOG090W07DX	Complete	EOG090W07HX	Fragmented	EOG090W086H	Complete
EOG090W07E5	Complete	EOG090W07IN	Complete	EOG090W086I	Complete
EOG090W07E9	Complete	EOG090W07IX	Complete	EOG090W086R	Complete
EOG090W07EX	Complete	EOG090W07J5	Missing	EOG090W086V	Complete
EOG090W07F6	Complete	EOG090W07JI	Complete	EOG090W087P	Complete
EOG090W07FZ	Complete	EOG090W07JL	Complete	EOG090W0883	Fragmented
EOG090W07G3	Complete	EOG090W07KB	Complete	EOG090W088E	Complete
EOG090W07G5	Complete	EOG090W07KX	Fragmented	EOG090W088P	Complete
EOG090W07GR	Fragmented	EOG090W07LR	Complete	EOG090W0895	Complete
EOG090W07HB	Complete	EOG090W07M6	Complete	EOG090W089J	Complete
EOG090W07HU	Complete	EOG090W07MD	Complete	EOG090W08A5	Complete
EOG090W07HX	Fragmented	EOG090W07MQ	Fragmented	EOG090W08A8	Complete
EOG090W07IN	Complete	EOG090W07MY	Complete	EOG090W08A9	Complete
EOG090W07IX	Complete	EOG090W07N7	Complete	EOG090W08AH	Complete
EOG090W07J5	Complete	EOG090W07N9	Fragmented	EOG090W08AJ	Complete
EOG090W07JI	Complete	EOG090W07NX	Complete	EOG090W08AN	Complete
EOG090W07JL	Complete	EOG090W07NY	Fragmented	EOG090W08AZ	Complete
EOG090W07KB	Fragmented	EOG090W07O3	Complete	EOG090W08BQ	Complete
EOG090W07KX	Fragmented	EOG090W07O8	Duplicated	EOG090W08CW	Complete
EOG090W07LR	Fragmented	EOG090W07O8	Duplicated	EOG090W08E4	Complete
EOG090W07M6	Complete	EOG090W07O8	Duplicated	EOG090W08E9	Complete
EOG090W07MD	Fragmented	EOG090W07OF	Complete	EOG090W08EJ	Fragmented
EOG090W07MQ	Fragmented	EOG090W07OI	Fragmented	EOG090W08EU	Fragmented
EOG090W07MY	Complete	EOG090W07OV	Complete	EOG090W08FE	Complete
EOG090W07N7	Complete	EOG090W07OW	Complete	EOG090W08FU	Complete
EOG090W07N9	Fragmented	EOG090W07P9	Complete	EOG090W08FZ	Complete
EOG090W07NX	Complete	EOG090W07PH	Complete	EOG090W08G0	Complete
EOG090W07NY	Fragmented	EOG090W07PK	Complete	EOG090W08GT	Complete
EOG090W07O3	Complete	EOG090W07PX	Duplicated	EOG090W08GU	Complete
EOG090W07O8	Duplicated	EOG090W07PX	Duplicated	EOG090W08HW	Complete
EOG090W07O8	Duplicated	EOG090W07QX	Complete	EOG090W08HZ	Complete
EOG090W07OF	Complete	EOG090W07RI	Complete	EOG090W08I2	Complete
EOG090W07OI	Missing	EOG090W07RR	Missing	EOG090W08IL	Complete
EOG090W07OV	Complete	EOG090W07RT	Complete	EOG090W08IZ	Missing
EOG090W07OW	Complete	EOG090W07RU	Complete	EOG090W08K1	Complete
EOG090W07P9	Complete	EOG090W07RY	Complete	EOG090W08KU	Complete
EOG090W07PH	Complete	EOG090W07S7	Complete	EOG090W08L6	Complete
EOG090W07PK	Complete	EOG090W07S8	Complete	EOG090W08LQ	Complete
EOG090W07PX	Duplicated	EOG090W07SE	Complete	EOG090W08LY	Complete
EOG090W07PX	Duplicated	EOG090W07TH	Complete	EOG090W08LZ	Complete
EOG090W07QX	Complete	EOG090W07TI	Duplicated	EOG090W08ME	Complete
EOG090W07RI	Complete	EOG090W07TI	Duplicated	EOG090W08N5	Complete
EOG090W07RR	Missing	EOG090W07TI	Duplicated	EOG090W08N8	Complete
EOG090W07RT	Complete	EOG090W07TZ	Complete	EOG090W08NW	Complete
EOG090W07RU	Complete	EOG090W07VM	Complete	EOG090W08NY	Fragmented
EOG090W07RY	Complete	EOG090W07WT	Duplicated	EOG090W08O9	Complete
EOG090W07S7	Complete	EOG090W07WT	Duplicated	EOG090W08OH	Complete
EOG090W07S8	Fragmented	EOG090W07WV	Missing	EOG090W08OS	Complete
EOG090W07SE	Complete	EOG090W07X1	Complete	EOG090W08QR	Fragmented
EOG090W07TH	Complete	EOG090W07XK	Complete	EOG090W08R7	Complete
EOG090W07TI	Duplicated	EOG090W07XP	Complete	EOG090W08RP	Complete
EOG090W07TI	Duplicated	EOG090W07XZ	Complete	EOG090W08RW	Missing
EOG090W07TI	Duplicated	EOG090W07YY	Complete	EOG090W08RZ	Complete
EOG090W07TZ	Duplicated	EOG090W07Z2	Fragmented	EOG090W08SI	Complete
EOG090W07TZ	Duplicated	EOG090W07ZG	Complete	EOG090W08SP	Fragmented
EOG090W07VM	Complete	EOG090W0800	Complete	EOG090W08TE	Complete
EOG090W07WT	Duplicated	EOG090W0803	Complete	EOG090W08TG	Duplicated
EOG090W07WT	Duplicated	EOG090W080B	Complete	EOG090W08TG	Duplicated
EOG090W07WV	Missing	EOG090W080Z	Complete	EOG090W08TH	Complete
EOG090W07X1	Complete	EOG090W081Z	Complete	EOG090W08TU	Complete
EOG090W07XK	Complete	EOG090W0828	Complete	EOG090W08V0	Complete
EOG090W07XP	Complete	EOG090W082E	Complete	EOG090W08W0	Complete
EOG090W07XZ	Complete	EOG090W082H	Complete	EOG090W08W4	Complete
EOG090W07YY	Fragmented	EOG090W084I	Complete	EOG090W08WV	Complete
EOG090W07Z2	Fragmented	EOG090W085S	Complete	EOG090W08WY	Complete
EOG090W07ZG	Complete	EOG090W0864	Fragmented	EOG090W08X5	Complete
EOG090W0800	Complete	EOG090W0865	Complete	EOG090W08X6	Complete
EOG090W0803	Complete	EOG090W0869	Fragmented	EOG090W08XG	Complete
EOG090W080B	Complete	EOG090W086H	Complete	EOG090W08XT	Complete
EOG090W080Z	Complete	EOG090W086I	Complete	EOG090W08XX	Complete
EOG090W081Z	Complete	EOG090W086R	Complete	EOG090W08YA	Complete
EOG090W0828	Complete	EOG090W086V	Complete	EOG090W08YB	Fragmented
EOG090W082E	Complete	EOG090W087P	Complete	EOG090W08YE	Complete
EOG090W082H	Complete	EOG090W0883	Fragmented	EOG090W08YM	Complete
EOG090W084I	Complete	EOG090W088E	Duplicated	EOG090W08Z4	Complete
EOG090W085S	Fragmented	EOG090W088E	Duplicated	EOG090W08Z6	Complete
EOG090W0864	Fragmented	EOG090W088P	Complete	EOG090W08ZA	Complete
EOG090W0865	Complete	EOG090W0895	Complete	EOG090W08ZR	Complete
EOG090W0869	Fragmented	EOG090W089J	Duplicated	EOG090W090B	Complete
EOG090W086H	Complete	EOG090W089J	Duplicated	EOG090W090H	Complete
EOG090W086I	Complete	EOG090W08A5	Complete	EOG090W090N	Complete
EOG090W086R	Fragmented	EOG090W08A8	Complete	EOG090W090V	Complete
EOG090W086V	Complete	EOG090W08A9	Complete	EOG090W0912	Complete
EOG090W087P	Complete	EOG090W08AH	Complete	EOG090W091X	Complete
EOG090W0883	Fragmented	EOG090W08AJ	Complete	EOG090W0924	Complete
EOG090W088E	Complete	EOG090W08AN	Complete	EOG090W092W	Complete
EOG090W088P	Complete	EOG090W08AZ	Fragmented	EOG090W0933	Complete
EOG090W0895	Complete	EOG090W08BQ	Duplicated	EOG090W0934	Complete
EOG090W089J	Complete	EOG090W08BQ	Duplicated	EOG090W093X	Complete
EOG090W08A5	Missing	EOG090W08CW	Duplicated	EOG090W093Z	Fragmented
EOG090W08A8	Duplicated	EOG090W08CW	Duplicated	EOG090W0946	Complete
EOG090W08A8	Duplicated	EOG090W08E4	Duplicated	EOG090W094H	Complete
EOG090W08A8	Duplicated	EOG090W08E4	Duplicated	EOG090W0951	Complete
EOG090W08A9	Fragmented	EOG090W08E9	Complete	EOG090W095F	Complete
EOG090W08AH	Complete	EOG090W08EJ	Complete	EOG090W095J	Complete
EOG090W08AJ	Complete	EOG090W08EU	Fragmented	EOG090W0963	Fragmented
EOG090W08AN	Fragmented	EOG090W08FE	Complete	EOG090W096X	Complete
EOG090W08AZ	Fragmented	EOG090W08FU	Fragmented	EOG090W0972	Complete
EOG090W08BQ	Complete	EOG090W08FZ	Complete	EOG090W097U	Complete
EOG090W08CW	Duplicated	EOG090W08G0	Fragmented	EOG090W098G	Complete
EOG090W08CW	Duplicated	EOG090W08GT	Complete	EOG090W099I	Complete
EOG090W08E4	Duplicated	EOG090W08GU	Complete	EOG090W09A5	Complete
EOG090W08E4	Duplicated	EOG090W08HW	Fragmented	EOG090W09AA	Complete
EOG090W08E9	Complete	EOG090W08HZ	Duplicated	EOG090W09AH	Complete
EOG090W08EJ	Complete	EOG090W08HZ	Duplicated	EOG090W09AW	Complete
EOG090W08EU	Fragmented	EOG090W08I2	Complete	EOG090W09B4	Complete
EOG090W08FE	Complete	EOG090W08IL	Complete	EOG090W09BJ	Complete
EOG090W08FU	Fragmented	EOG090W08IZ	Missing	EOG090W09BV	Complete
EOG090W08FZ	Complete	EOG090W08K1	Complete	EOG090W09C5	Fragmented
EOG090W08G0	Fragmented	EOG090W08KU	Complete	EOG090W09DT	Complete
EOG090W08GT	Complete	EOG090W08L6	Complete	EOG090W09EY	Complete
EOG090W08GU	Complete	EOG090W08LQ	Complete	EOG090W09F8	Complete
EOG090W08HW	Fragmented	EOG090W08LY	Complete	EOG090W09FJ	Complete
EOG090W08HZ	Duplicated	EOG090W08LZ	Complete	EOG090W09FX	Complete
EOG090W08HZ	Duplicated	EOG090W08ME	Complete	EOG090W09FY	Complete
EOG090W08HZ	Duplicated	EOG090W08N5	Complete	EOG090W09GM	Missing
EOG090W08I2	Duplicated	EOG090W08N8	Duplicated	EOG090W09H7	Complete
EOG090W08I2	Duplicated	EOG090W08N8	Duplicated	EOG090W09HB	Complete
EOG090W08IL	Complete	EOG090W08N8	Duplicated	EOG090W09HF	Complete
EOG090W08IZ	Missing	EOG090W08NW	Complete	EOG090W09HQ	Complete
EOG090W08K1	Complete	EOG090W08NY	Fragmented	EOG090W09HR	Complete
EOG090W08KU	Complete	EOG090W08O9	Complete	EOG090W09IF	Complete
EOG090W08L6	Complete	EOG090W08OH	Duplicated	EOG090W09IG	Missing
EOG090W08LQ	Complete	EOG090W08OH	Duplicated	EOG090W09II	Complete
EOG090W08LY	Complete	EOG090W08OS	Complete	EOG090W09IN	Complete
EOG090W08LZ	Complete	EOG090W08QR	Missing	EOG090W09J2	Complete
EOG090W08ME	Complete	EOG090W08R7	Complete	EOG090W09K7	Complete
EOG090W08N5	Complete	EOG090W08RP	Complete	EOG090W09KF	Complete
EOG090W08N8	Duplicated	EOG090W08RW	Missing	EOG090W09KG	Complete
EOG090W08N8	Duplicated	EOG090W08RZ	Complete	EOG090W09KH	Complete
EOG090W08NW	Complete	EOG090W08SI	Complete	EOG090W09KU	Complete
EOG090W08NY	Complete	EOG090W08SP	Fragmented	EOG090W09LF	Complete
EOG090W08O9	Complete	EOG090W08TE	Complete	EOG090W09LK	Complete
EOG090W08OH	Duplicated	EOG090W08TG	Complete	EOG090W09NN	Complete
EOG090W08OH	Duplicated	EOG090W08TH	Complete	EOG090W09P8	Duplicated
EOG090W08OS	Complete	EOG090W08TU	Complete	EOG090W09P8	Duplicated
EOG090W08QR	Fragmented	EOG090W08V0	Complete	EOG090W09PJ	Complete
EOG090W08R7	Complete	EOG090W08W0	Complete	EOG090W09PQ	Complete
EOG090W08RP	Complete	EOG090W08W4	Complete	EOG090W09QT	Complete
EOG090W08RW	Missing	EOG090W08WV	Fragmented	EOG090W09R9	Complete
EOG090W08RZ	Complete	EOG090W08WY	Complete	EOG090W09RM	Complete
EOG090W08SI	Complete	EOG090W08X5	Complete	EOG090W09RO	Complete
EOG090W08SP	Complete	EOG090W08X6	Complete	EOG090W09RQ	Complete
EOG090W08TE	Complete	EOG090W08XG	Complete	EOG090W09T9	Complete
EOG090W08TG	Duplicated	EOG090W08XT	Missing	EOG090W09U9	Complete
EOG090W08TG	Duplicated	EOG090W08XX	Complete	EOG090W09UL	Complete
EOG090W08TH	Complete	EOG090W08YA	Complete	EOG090W09UU	Complete
EOG090W08TU	Duplicated	EOG090W08YB	Complete	EOG090W09UY	Complete
EOG090W08TU	Duplicated	EOG090W08YE	Complete	EOG090W09VN	Complete
EOG090W08TU	Duplicated	EOG090W08YM	Complete	EOG090W09W5	Complete
EOG090W08V0	Complete	EOG090W08Z4	Complete	EOG090W09WW	Complete
EOG090W08W0	Complete	EOG090W08Z6	Complete	EOG090W09WZ	Complete
EOG090W08W4	Complete	EOG090W08ZA	Complete	EOG090W09XP	Complete
EOG090W08WV	Complete	EOG090W08ZR	Complete	EOG090W09XZ	Complete
EOG090W08WY	Complete	EOG090W090B	Complete	EOG090W09Y7	Complete
EOG090W08X5	Complete	EOG090W090H	Complete	EOG090W09Y9	Fragmented
EOG090W08X6	Complete	EOG090W090N	Fragmented	EOG090W09ZT	Complete
EOG090W08XG	Complete	EOG090W090V	Complete	EOG090W09ZY	Complete
EOG090W08XT	Complete	EOG090W0912	Complete	EOG090W0A0A	Complete
EOG090W08XX	Complete	EOG090W091X	Fragmented	EOG090W0A19	Complete
EOG090W08YA	Complete	EOG090W0924	Complete	EOG090W0A1G	Complete
EOG090W08YB	Complete	EOG090W092W	Complete	EOG090W0A21	Complete
EOG090W08YE	Complete	EOG090W0933	Complete	EOG090W0A2E	Complete
EOG090W08YM	Complete	EOG090W0934	Complete	EOG090W0A2F	Complete
EOG090W08Z4	Complete	EOG090W093X	Complete	EOG090W0A38	Complete
EOG090W08Z6	Complete	EOG090W093Z	Missing	EOG090W0A3C	Complete
EOG090W08ZA	Complete	EOG090W0946	Complete	EOG090W0A3V	Complete
EOG090W08ZR	Complete	EOG090W094H	Complete	EOG090W0A3Z	Complete
EOG090W090B	Complete	EOG090W0951	Complete	EOG090W0A4R	Complete
EOG090W090H	Complete	EOG090W095F	Complete	EOG090W0A4U	Duplicated
EOG090W090N	Fragmented	EOG090W095J	Complete	EOG090W0A4U	Duplicated
EOG090W090V	Complete	EOG090W0963	Missing	EOG090W0A4U	Duplicated
EOG090W0912	Complete	EOG090W096X	Duplicated	EOG090W0A4Y	Complete
EOG090W091X	Complete	EOG090W096X	Duplicated	EOG090W0A4Z	Complete
EOG090W0924	Complete	EOG090W0972	Duplicated	EOG090W0A55	Complete
EOG090W092W	Complete	EOG090W0972	Duplicated	EOG090W0A58	Complete
EOG090W0933	Complete	EOG090W097U	Complete	EOG090W0A69	Complete
EOG090W0934	Complete	EOG090W098G	Complete	EOG090W0A6T	Complete
EOG090W093X	Complete	EOG090W099I	Complete	EOG090W0A73	Complete
EOG090W093Z	Fragmented	EOG090W09A5	Complete	EOG090W0A76	Complete
EOG090W0946	Complete	EOG090W09AA	Missing	EOG090W0A7T	Complete
EOG090W094H	Complete	EOG090W09AH	Complete	EOG090W0A8S	Complete
EOG090W0951	Complete	EOG090W09AW	Complete	EOG090W0A8U	Fragmented
EOG090W095F	Complete	EOG090W09B4	Complete	EOG090W0A93	Complete
EOG090W095J	Complete	EOG090W09BJ	Complete	EOG090W0A94	Complete
EOG090W0963	Missing	EOG090W09BV	Duplicated	EOG090W0A9K	Complete
EOG090W096X	Duplicated	EOG090W09BV	Duplicated	EOG090W0AAD	Complete
EOG090W096X	Duplicated	EOG090W09C5	Complete	EOG090W0AAQ	Complete
EOG090W0972	Duplicated	EOG090W09DT	Complete	EOG090W0AB4	Complete
EOG090W0972	Duplicated	EOG090W09EY	Complete	EOG090W0AC1	Complete
EOG090W097U	Complete	EOG090W09F8	Complete	EOG090W0AC2	Complete
EOG090W098G	Complete	EOG090W09FJ	Complete	EOG090W0AC4	Missing
EOG090W099I	Complete	EOG090W09FX	Complete	EOG090W0ACA	Complete
EOG090W09A5	Complete	EOG090W09FY	Complete	EOG090W0ACN	Complete
EOG090W09AA	Missing	EOG090W09GM	Missing	EOG090W0ADL	Complete
EOG090W09AH	Complete	EOG090W09H7	Duplicated	EOG090W0AEN	Complete
EOG090W09AW	Complete	EOG090W09H7	Duplicated	EOG090W0AEW	Complete
EOG090W09B4	Complete	EOG090W09HB	Complete	EOG090W0AF2	Complete
EOG090W09BJ	Complete	EOG090W09HF	Complete	EOG090W0AF5	Complete
EOG090W09BV	Complete	EOG090W09HQ	Fragmented	EOG090W0AFE	Fragmented
EOG090W09C5	Fragmented	EOG090W09HR	Complete	EOG090W0AFV	Complete
EOG090W09DT	Duplicated	EOG090W09IF	Complete	EOG090W0AG2	Complete
EOG090W09DT	Duplicated	EOG090W09IG	Fragmented	EOG090W0AGC	Complete
EOG090W09DT	Duplicated	EOG090W09II	Fragmented	EOG090W0AH4	Complete
EOG090W09EY	Complete	EOG090W09IN	Complete	EOG090W0AH5	Complete
EOG090W09F8	Complete	EOG090W09J2	Complete	EOG090W0AHA	Complete
EOG090W09FJ	Complete	EOG090W09K7	Duplicated	EOG090W0AHP	Complete
EOG090W09FX	Complete	EOG090W09K7	Duplicated	EOG090W0AHR	Fragmented
EOG090W09FY	Fragmented	EOG090W09KF	Complete	EOG090W0AIA	Duplicated
EOG090W09GM	Missing	EOG090W09KG	Duplicated	EOG090W0AIA	Duplicated
EOG090W09H7	Missing	EOG090W09KG	Duplicated	EOG090W0AJN	Complete
EOG090W09HB	Complete	EOG090W09KH	Complete	EOG090W0AK7	Complete
EOG090W09HF	Complete	EOG090W09KU	Complete	EOG090W0AKG	Complete
EOG090W09HQ	Fragmented	EOG090W09LF	Complete	EOG090W0AKY	Missing
EOG090W09HR	Complete	EOG090W09LK	Complete	EOG090W0ALA	Complete
EOG090W09IF	Complete	EOG090W09NN	Complete	EOG090W0ALP	Complete
EOG090W09IG	Fragmented	EOG090W09P8	Duplicated	EOG090W0ALS	Complete
EOG090W09II	Fragmented	EOG090W09P8	Duplicated	EOG090W0ALV	Complete
EOG090W09IN	Complete	EOG090W09PJ	Complete	EOG090W0AMG	Complete
EOG090W09J2	Fragmented	EOG090W09PQ	Complete	EOG090W0AMV	Fragmented
EOG090W09K7	Duplicated	EOG090W09QT	Complete	EOG090W0ANA	Complete
EOG090W09K7	Duplicated	EOG090W09R9	Duplicated	EOG090W0ANC	Complete
EOG090W09KF	Complete	EOG090W09R9	Duplicated	EOG090W0ANZ	Complete
EOG090W09KG	Duplicated	EOG090W09RM	Complete	EOG090W0AO3	Complete
EOG090W09KG	Duplicated	EOG090W09RO	Complete	EOG090W0AOA	Complete
EOG090W09KG	Duplicated	EOG090W09RQ	Complete	EOG090W0AOE	Complete
EOG090W09KH	Complete	EOG090W09T9	Complete	EOG090W0AOU	Complete
EOG090W09KU	Complete	EOG090W09U9	Complete	EOG090W0APL	Complete
EOG090W09LF	Complete	EOG090W09UL	Complete	EOG090W0APR	Complete
EOG090W09LK	Complete	EOG090W09UU	Fragmented	EOG090W0APT	Complete
EOG090W09NN	Complete	EOG090W09UY	Complete	EOG090W0AQT	Complete
EOG090W09P8	Duplicated	EOG090W09VN	Complete	EOG090W0AS2	Complete
EOG090W09P8	Duplicated	EOG090W09W5	Complete	EOG090W0AS9	Complete
EOG090W09PJ	Complete	EOG090W09WW	Complete	EOG090W0ASA	Complete
EOG090W09PQ	Complete	EOG090W09WZ	Complete	EOG090W0ASE	Missing
EOG090W09QT	Complete	EOG090W09XP	Complete	EOG090W0ASF	Complete
EOG090W09R9	Complete	EOG090W09XZ	Complete	EOG090W0ATA	Complete
EOG090W09RM	Fragmented	EOG090W09Y7	Complete	EOG090W0ATC	Complete
EOG090W09RO	Complete	EOG090W09Y9	Fragmented	EOG090W0ATJ	Complete
EOG090W09RQ	Duplicated	EOG090W09ZT	Complete	EOG090W0ATR	Complete
EOG090W09RQ	Duplicated	EOG090W09ZY	Fragmented	EOG090W0ATV	Complete
EOG090W09T9	Complete	EOG090W0A0A	Complete	EOG090W0AUB	Complete
EOG090W09U9	Complete	EOG090W0A19	Complete	EOG090W0AUD	Complete
EOG090W09UL	Complete	EOG090W0A1G	Complete	EOG090W0AUH	Complete
EOG090W09UU	Fragmented	EOG090W0A21	Complete	EOG090W0AUV	Complete
EOG090W09UY	Fragmented	EOG090W0A2E	Complete	EOG090W0AV1	Complete
EOG090W09VN	Complete	EOG090W0A2F	Complete	EOG090W0AV2	Complete
EOG090W09W5	Complete	EOG090W0A38	Complete	EOG090W0AVB	Complete
EOG090W09WW	Complete	EOG090W0A3C	Complete	EOG090W0AVF	Complete
EOG090W09WZ	Complete	EOG090W0A3V	Complete	EOG090W0AVT	Complete
EOG090W09XP	Complete	EOG090W0A3Z	Complete	EOG090W0AXJ	Complete
EOG090W09XZ	Complete	EOG090W0A4R	Complete	EOG090W0AY7	Complete
EOG090W09Y7	Complete	EOG090W0A4U	Complete	EOG090W0AY8	Complete
EOG090W09Y9	Complete	EOG090W0A4Y	Complete	EOG090W0AYT	Fragmented
EOG090W09ZT	Complete	EOG090W0A4Z	Complete	EOG090W0AZ8	Complete
EOG090W09ZY	Complete	EOG090W0A55	Complete	EOG090W0AZN	Complete
EOG090W0A0A	Complete	EOG090W0A58	Fragmented	EOG090W0B0A	Complete
EOG090W0A19	Complete	EOG090W0A69	Fragmented	EOG090W0B0M	Complete
EOG090W0A1G	Complete	EOG090W0A6T	Complete	EOG090W0B1A	Complete
EOG090W0A21	Complete	EOG090W0A73	Complete	EOG090W0B1Y	Complete
EOG090W0A2E	Complete	EOG090W0A76	Fragmented	EOG090W0B33	Complete
EOG090W0A2F	Duplicated	EOG090W0A7T	Complete	EOG090W0B3U	Complete
EOG090W0A2F	Duplicated	EOG090W0A8S	Fragmented	EOG090W0B3V	Fragmented
EOG090W0A38	Complete	EOG090W0A8U	Duplicated	EOG090W0B4C	Complete
EOG090W0A3C	Complete	EOG090W0A8U	Duplicated	EOG090W0B5K	Complete
EOG090W0A3V	Complete	EOG090W0A93	Complete	EOG090W0B5T	Complete
EOG090W0A3Z	Complete	EOG090W0A94	Complete	EOG090W0B6F	Complete
EOG090W0A4R	Complete	EOG090W0A9K	Complete	EOG090W0B6J	Complete
EOG090W0A4U	Duplicated	EOG090W0AAD	Complete	EOG090W0B6K	Fragmented
EOG090W0A4U	Duplicated	EOG090W0AAQ	Fragmented	EOG090W0B6L	Complete
EOG090W0A4U	Duplicated	EOG090W0AB4	Complete	EOG090W0B6U	Complete
EOG090W0A4Y	Complete	EOG090W0AC1	Complete	EOG090W0B8H	Complete
EOG090W0A4Z	Complete	EOG090W0AC2	Fragmented	EOG090W0B8O	Duplicated
EOG090W0A55	Complete	EOG090W0AC4	Missing	EOG090W0B8O	Duplicated
EOG090W0A58	Fragmented	EOG090W0ACA	Complete	EOG090W0B8P	Complete
EOG090W0A69	Fragmented	EOG090W0ACN	Fragmented	EOG090W0B8T	Complete
EOG090W0A6T	Fragmented	EOG090W0ADL	Fragmented	EOG090W0B99	Complete
EOG090W0A73	Complete	EOG090W0AEN	Fragmented	EOG090W0B9E	Complete
EOG090W0A76	Missing	EOG090W0AEW	Complete	EOG090W0B9P	Complete
EOG090W0A7T	Complete	EOG090W0AF2	Fragmented	EOG090W0B9U	Complete
EOG090W0A8S	Fragmented	EOG090W0AF5	Complete	EOG090W0B9V	Complete
EOG090W0A8U	Complete	EOG090W0AFE	Fragmented	EOG090W0BAT	Complete
EOG090W0A93	Complete	EOG090W0AFV	Complete	EOG090W0BB8	Complete
EOG090W0A94	Complete	EOG090W0AG2	Complete	EOG090W0BBK	Duplicated
EOG090W0A9K	Complete	EOG090W0AGC	Complete	EOG090W0BBK	Duplicated
EOG090W0AAD	Complete	EOG090W0AH4	Duplicated	EOG090W0BBM	Complete
EOG090W0AAQ	Fragmented	EOG090W0AH4	Duplicated	EOG090W0BC3	Complete
EOG090W0AB4	Complete	EOG090W0AH4	Duplicated	EOG090W0BCB	Complete
EOG090W0AC1	Complete	EOG090W0AH5	Complete	EOG090W0BCL	Fragmented
EOG090W0AC2	Fragmented	EOG090W0AHA	Complete	EOG090W0BDF	Complete
EOG090W0AC4	Missing	EOG090W0AHP	Complete	EOG090W0BDW	Complete
EOG090W0ACA	Complete	EOG090W0AHR	Fragmented	EOG090W0BE3	Complete
EOG090W0ACN	Fragmented	EOG090W0AIA	Duplicated	EOG090W0BEB	Complete
EOG090W0ADL	Duplicated	EOG090W0AIA	Duplicated	EOG090W0BEI	Complete
EOG090W0ADL	Duplicated	EOG090W0AJN	Complete	EOG090W0BEN	Complete
EOG090W0AEN	Complete	EOG090W0AK7	Duplicated	EOG090W0BFE	Complete
EOG090W0AEW	Complete	EOG090W0AK7	Duplicated	EOG090W0BFY	Complete
EOG090W0AF2	Fragmented	EOG090W0AKG	Complete	EOG090W0BH2	Complete
EOG090W0AF5	Fragmented	EOG090W0AKY	Duplicated	EOG090W0BH5	Complete
EOG090W0AFE	Fragmented	EOG090W0AKY	Duplicated	EOG090W0BHM	Complete
EOG090W0AFV	Complete	EOG090W0AKY	Duplicated	EOG090W0BHT	Complete
EOG090W0AG2	Complete	EOG090W0ALA	Complete	EOG090W0BHX	Complete
EOG090W0AGC	Complete	EOG090W0ALP	Complete	EOG090W0BI6	Complete
EOG090W0AH4	Complete	EOG090W0ALS	Duplicated	EOG090W0BIJ	Fragmented
EOG090W0AH5	Complete	EOG090W0ALS	Duplicated	EOG090W0BJ4	Duplicated
EOG090W0AHA	Complete	EOG090W0ALV	Complete	EOG090W0BJ4	Duplicated
EOG090W0AHP	Complete	EOG090W0AMG	Complete	EOG090W0BJO	Complete
EOG090W0AHR	Fragmented	EOG090W0AMV	Fragmented	EOG090W0BJR	Complete
EOG090W0AIA	Duplicated	EOG090W0ANA	Duplicated	EOG090W0BKG	Complete
EOG090W0AIA	Duplicated	EOG090W0ANA	Duplicated	EOG090W0BKQ	Complete
EOG090W0AJN	Complete	EOG090W0ANC	Complete	EOG090W0BKY	Complete
EOG090W0AK7	Complete	EOG090W0ANZ	Complete	EOG090W0BL8	Complete
EOG090W0AKG	Complete	EOG090W0AO3	Complete	EOG090W0BLN	Complete
EOG090W0AKY	Duplicated	EOG090W0AOA	Complete	EOG090W0BLP	Complete
EOG090W0AKY	Duplicated	EOG090W0AOE	Complete	EOG090W0BLQ	Complete
EOG090W0AKY	Duplicated	EOG090W0AOU	Duplicated	EOG090W0BM0	Complete
EOG090W0ALA	Complete	EOG090W0AOU	Duplicated	EOG090W0BM8	Complete
EOG090W0ALP	Complete	EOG090W0APL	Duplicated	EOG090W0BMF	Complete
EOG090W0ALS	Duplicated	EOG090W0APL	Duplicated	EOG090W0BMK	Complete
EOG090W0ALS	Duplicated	EOG090W0APL	Duplicated	EOG090W0BMW	Missing
EOG090W0ALV	Complete	EOG090W0APR	Fragmented	EOG090W0BN3	Complete
EOG090W0AMG	Complete	EOG090W0APT	Duplicated	EOG090W0BNM	Complete
EOG090W0AMV	Fragmented	EOG090W0APT	Duplicated	EOG090W0BNR	Complete
EOG090W0ANA	Duplicated	EOG090W0AQT	Complete	EOG090W0BO9	Complete
EOG090W0ANA	Duplicated	EOG090W0AS2	Complete	EOG090W0BOC	Complete
EOG090W0ANC	Complete	EOG090W0AS9	Complete	EOG090W0BOJ	Complete
EOG090W0ANZ	Complete	EOG090W0ASA	Duplicated	EOG090W0BOZ	Complete
EOG090W0AO3	Missing	EOG090W0ASA	Duplicated	EOG090W0BPH	Complete
EOG090W0AOA	Complete	EOG090W0ASE	Missing	EOG090W0BQM	Complete
EOG090W0AOE	Complete	EOG090W0ASF	Complete	EOG090W0BQS	Complete
EOG090W0AOU	Complete	EOG090W0ATA	Fragmented	EOG090W0BR7	Complete
EOG090W0APL	Duplicated	EOG090W0ATC	Complete	EOG090W0BRV	Complete
EOG090W0APL	Duplicated	EOG090W0ATJ	Duplicated	EOG090W0BS6	Complete
EOG090W0APL	Duplicated	EOG090W0ATJ	Duplicated	EOG090W0BU3	Complete
EOG090W0APR	Complete	EOG090W0ATJ	Duplicated	EOG090W0BU7	Duplicated
EOG090W0APT	Complete	EOG090W0ATR	Complete	EOG090W0BU7	Duplicated
EOG090W0AQT	Complete	EOG090W0ATV	Fragmented	EOG090W0BU7	Duplicated
EOG090W0AS2	Complete	EOG090W0AUB	Complete	EOG090W0BUL	Complete
EOG090W0AS9	Complete	EOG090W0AUD	Fragmented	EOG090W0BUN	Complete
EOG090W0ASA	Complete	EOG090W0AUH	Complete	EOG090W0BUR	Complete
EOG090W0ASE	Missing	EOG090W0AUV	Duplicated	EOG090W0BVJ	Complete
EOG090W0ASF	Complete	EOG090W0AUV	Duplicated	EOG090W0BVM	Complete
EOG090W0ATA	Fragmented	EOG090W0AUV	Duplicated	EOG090W0BWB	Complete
EOG090W0ATC	Complete	EOG090W0AV1	Complete	EOG090W0BXM	Complete
EOG090W0ATJ	Duplicated	EOG090W0AV2	Complete	EOG090W0BXX	Complete
EOG090W0ATJ	Duplicated	EOG090W0AVB	Complete	EOG090W0BY4	Complete
EOG090W0ATJ	Duplicated	EOG090W0AVF	Complete	EOG090W0BYI	Complete
EOG090W0ATR	Complete	EOG090W0AVT	Fragmented	EOG090W0BYQ	Complete
EOG090W0ATV	Fragmented	EOG090W0AXJ	Complete	EOG090W0BYS	Complete
EOG090W0AUB	Complete	EOG090W0AY7	Complete	EOG090W0BZ2	Complete
EOG090W0AUD	Duplicated	EOG090W0AY8	Complete	EOG090W0BZ3	Complete
EOG090W0AUD	Duplicated	EOG090W0AYT	Fragmented	EOG090W0C06	Complete
EOG090W0AUH	Complete	EOG090W0AZ8	Complete	EOG090W0C07	Complete
EOG090W0AUV	Duplicated	EOG090W0AZN	Fragmented	EOG090W0C0H	Complete
EOG090W0AUV	Duplicated	EOG090W0B0A	Complete	EOG090W0C2I	Complete
EOG090W0AUV	Duplicated	EOG090W0B0M	Complete	EOG090W0C2W	Complete
EOG090W0AV1	Complete	EOG090W0B1A	Complete	EOG090W0C2X	Complete
EOG090W0AV2	Complete	EOG090W0B1Y	Complete	EOG090W0C3I	Complete
EOG090W0AVB	Complete	EOG090W0B33	Complete	EOG090W0C3P	Complete
EOG090W0AVF	Complete	EOG090W0B3U	Complete	EOG090W0C4Z	Complete
EOG090W0AVT	Fragmented	EOG090W0B3V	Fragmented	EOG090W0C5P	Complete
EOG090W0AXJ	Complete	EOG090W0B4C	Complete	EOG090W0C5R	Complete
EOG090W0AY7	Complete	EOG090W0B5K	Complete	EOG090W0C5V	Complete
EOG090W0AY8	Complete	EOG090W0B5T	Complete	EOG090W0C66	Complete
EOG090W0AYT	Fragmented	EOG090W0B6F	Duplicated	EOG090W0C7E	Complete
EOG090W0AZ8	Fragmented	EOG090W0B6F	Duplicated	EOG090W0C7L	Complete
EOG090W0AZN	Fragmented	EOG090W0B6J	Complete	EOG090W0C7S	Complete
EOG090W0B0A	Complete	EOG090W0B6K	Complete	EOG090W0C7T	Complete
EOG090W0B0M	Complete	EOG090W0B6L	Complete	EOG090W0C7Z	Complete
EOG090W0B1A	Duplicated	EOG090W0B6U	Complete	EOG090W0C83	Complete
EOG090W0B1A	Duplicated	EOG090W0B8H	Duplicated	EOG090W0C86	Complete
EOG090W0B1Y	Complete	EOG090W0B8H	Duplicated	EOG090W0C8B	Complete
EOG090W0B33	Complete	EOG090W0B8H	Duplicated	EOG090W0C9K	Complete
EOG090W0B3U	Complete	EOG090W0B8O	Duplicated	EOG090W0CAH	Complete
EOG090W0B3V	Fragmented	EOG090W0B8O	Duplicated	EOG090W0CAR	Complete
EOG090W0B4C	Complete	EOG090W0B8P	Complete	EOG090W0CB4	Complete
EOG090W0B5K	Complete	EOG090W0B8T	Complete	EOG090W0CBA	Complete
EOG090W0B5T	Complete	EOG090W0B99	Duplicated	EOG090W0CBB	Complete
EOG090W0B6F	Duplicated	EOG090W0B99	Duplicated	EOG090W0CBD	Complete
EOG090W0B6F	Duplicated	EOG090W0B9E	Fragmented	EOG090W0CBZ	Complete
EOG090W0B6J	Complete	EOG090W0B9P	Complete	EOG090W0CCI	Complete
EOG090W0B6K	Duplicated	EOG090W0B9U	Complete	EOG090W0CCL	Complete
EOG090W0B6K	Duplicated	EOG090W0B9V	Complete	EOG090W0CCX	Fragmented
EOG090W0B6L	Complete	EOG090W0BAT	Complete	EOG090W0CD1	Complete
EOG090W0B6U	Complete	EOG090W0BB8	Complete	EOG090W0CDV	Complete
EOG090W0B8H	Duplicated	EOG090W0BBK	Complete	EOG090W0CFA	Fragmented
EOG090W0B8H	Duplicated	EOG090W0BBM	Fragmented	EOG090W0CFQ	Complete
EOG090W0B8O	Complete	EOG090W0BC3	Complete	EOG090W0CG0	Complete
EOG090W0B8P	Complete	EOG090W0BCB	Fragmented	EOG090W0CGD	Complete
EOG090W0B8T	Complete	EOG090W0BCL	Fragmented	EOG090W0CHN	Complete
EOG090W0B99	Complete	EOG090W0BDF	Fragmented	EOG090W0CHQ	Complete
EOG090W0B9E	Fragmented	EOG090W0BDW	Complete	EOG090W0CI3	Complete
EOG090W0B9P	Complete	EOG090W0BE3	Complete	EOG090W0CIU	Complete
EOG090W0B9U	Complete	EOG090W0BEB	Duplicated	EOG090W0CJ5	Complete
EOG090W0B9V	Complete	EOG090W0BEB	Duplicated	EOG090W0CK8	Complete
EOG090W0BAT	Complete	EOG090W0BEB	Duplicated	EOG090W0CKZ	Fragmented
EOG090W0BB8	Fragmented	EOG090W0BEI	Duplicated	EOG090W0CL8	Complete
EOG090W0BBK	Complete	EOG090W0BEI	Duplicated	EOG090W0CLA	Complete
EOG090W0BBM	Fragmented	EOG090W0BEI	Duplicated	EOG090W0CLF	Complete
EOG090W0BC3	Complete	EOG090W0BEN	Complete	EOG090W0CLI	Complete
EOG090W0BCB	Fragmented	EOG090W0BFE	Complete	EOG090W0CMD	Complete
EOG090W0BCL	Complete	EOG090W0BFY	Complete	EOG090W0CME	Complete
EOG090W0BDF	Complete	EOG090W0BH2	Complete	EOG090W0CMI	Complete
EOG090W0BDW	Complete	EOG090W0BH5	Complete	EOG090W0CMM	Complete
EOG090W0BE3	Complete	EOG090W0BHM	Duplicated	EOG090W0CMO	Complete
EOG090W0BEB	Complete	EOG090W0BHM	Duplicated	EOG090W0CN5	Complete
EOG090W0BEI	Duplicated	EOG090W0BHT	Complete	EOG090W0CNN	Complete
EOG090W0BEI	Duplicated	EOG090W0BHX	Complete	EOG090W0COH	Complete
EOG090W0BEN	Complete	EOG090W0BI6	Fragmented	EOG090W0CQ9	Complete
EOG090W0BFE	Complete	EOG090W0BIJ	Fragmented	EOG090W0CQO	Complete
EOG090W0BFY	Complete	EOG090W0BJ4	Fragmented	EOG090W0CRH	Complete
EOG090W0BH2	Complete	EOG090W0BJO	Complete	EOG090W0CRK	Complete
EOG090W0BH5	Complete	EOG090W0BJR	Complete	EOG090W0CRM	Complete
EOG090W0BHM	Duplicated	EOG090W0BKG	Complete	EOG090W0CS7	Complete
EOG090W0BHM	Duplicated	EOG090W0BKQ	Complete	EOG090W0CS8	Complete
EOG090W0BHT	Complete	EOG090W0BKY	Complete	EOG090W0CSI	Complete
EOG090W0BHX	Complete	EOG090W0BL8	Complete	EOG090W0CTN	Complete
EOG090W0BI6	Complete	EOG090W0BLN	Complete	EOG090W0CUM	Complete
EOG090W0BIJ	Fragmented	EOG090W0BLP	Complete	EOG090W0CVF	Complete
EOG090W0BJ4	Duplicated	EOG090W0BLQ	Fragmented	EOG090W0CW6	Fragmented
EOG090W0BJ4	Duplicated	EOG090W0BM0	Complete	EOG090W0CYA	Complete
EOG090W0BJO	Complete	EOG090W0BM8	Complete	EOG090W0CYG	Complete
EOG090W0BJR	Complete	EOG090W0BMF	Fragmented	EOG090W0CZC	Complete
EOG090W0BKG	Complete	EOG090W0BMK	Complete	EOG090W0CZI	Complete
EOG090W0BKQ	Complete	EOG090W0BMW	Fragmented	EOG090W0CZK	Fragmented
EOG090W0BKY	Fragmented	EOG090W0BN3	Complete	EOG090W0D0E	Complete
EOG090W0BL8	Complete	EOG090W0BNM	Complete	EOG090W0D21	Complete
EOG090W0BLN	Complete	EOG090W0BNR	Complete	EOG090W0D2Y	Complete
EOG090W0BLP	Complete	EOG090W0BO9	Complete	EOG090W0D3K	Complete
EOG090W0BLQ	Fragmented	EOG090W0BOC	Complete	EOG090W0D56	Complete
EOG090W0BM0	Complete	EOG090W0BOJ	Duplicated	EOG090W0D5A	Complete
EOG090W0BM8	Duplicated	EOG090W0BOJ	Duplicated	EOG090W0D5E	Complete
EOG090W0BM8	Duplicated	EOG090W0BOZ	Complete	EOG090W0D62	Complete
EOG090W0BM8	Duplicated	EOG090W0BPH	Complete	EOG090W0D6S	Complete
EOG090W0BMF	Duplicated	EOG090W0BQM	Complete	EOG090W0D73	Complete
EOG090W0BMF	Duplicated	EOG090W0BQS	Complete	EOG090W0D7J	Missing
EOG090W0BMK	Complete	EOG090W0BR7	Complete	EOG090W0DA8	Fragmented
EOG090W0BMW	Missing	EOG090W0BRV	Complete	EOG090W0DAB	Complete
EOG090W0BN3	Complete	EOG090W0BS6	Complete	EOG090W0DAF	Complete
EOG090W0BNM	Complete	EOG090W0BU3	Complete	EOG090W0DAR	Complete
EOG090W0BNR	Complete	EOG090W0BU7	Complete	EOG090W0DAS	Complete
EOG090W0BO9	Complete	EOG090W0BUL	Complete	EOG090W0DB5	Complete
EOG090W0BOC	Complete	EOG090W0BUN	Complete	EOG090W0DBH	Complete
EOG090W0BOJ	Complete	EOG090W0BUR	Complete	EOG090W0DBJ	Complete
EOG090W0BOZ	Complete	EOG090W0BVJ	Complete	EOG090W0DD5	Complete
EOG090W0BPH	Complete	EOG090W0BVM	Complete	EOG090W0DDM	Complete
EOG090W0BQM	Complete	EOG090W0BWB	Complete	EOG090W0DE3	Complete
EOG090W0BQS	Complete	EOG090W0BXM	Complete	EOG090W0DEY	Complete
EOG090W0BR7	Duplicated	EOG090W0BXX	Complete	EOG090W0DF8	Complete
EOG090W0BR7	Duplicated	EOG090W0BY4	Complete	EOG090W0DFD	Complete
EOG090W0BRV	Complete	EOG090W0BYI	Duplicated	EOG090W0DFY	Complete
EOG090W0BS6	Complete	EOG090W0BYI	Duplicated	EOG090W0DGR	Complete
EOG090W0BU3	Complete	EOG090W0BYQ	Complete	EOG090W0DHR	Complete
EOG090W0BU7	Duplicated	EOG090W0BYS	Complete	EOG090W0DJ4	Complete
EOG090W0BU7	Duplicated	EOG090W0BZ2	Complete	EOG090W0DJ7	Complete
EOG090W0BU7	Duplicated	EOG090W0BZ3	Complete	EOG090W0DJI	Complete
EOG090W0BUL	Complete	EOG090W0C06	Duplicated	EOG090W0DJM	Complete
EOG090W0BUN	Complete	EOG090W0C06	Duplicated	EOG090W0DJY	Complete
EOG090W0BUR	Complete	EOG090W0C06	Duplicated	EOG090W0DK9	Complete
EOG090W0BVJ	Fragmented	EOG090W0C07	Complete	EOG090W0DKY	Complete
EOG090W0BVM	Fragmented	EOG090W0C0H	Complete	EOG090W0DLD	Complete
EOG090W0BWB	Complete	EOG090W0C2I	Complete	EOG090W0DM3	Complete
EOG090W0BXM	Complete	EOG090W0C2W	Complete	EOG090W0DMC	Complete
EOG090W0BXX	Complete	EOG090W0C2X	Complete	EOG090W0DMH	Complete
EOG090W0BY4	Complete	EOG090W0C3I	Complete	EOG090W0DNL	Complete
EOG090W0BYI	Duplicated	EOG090W0C3P	Complete	EOG090W0DNM	Complete
EOG090W0BYI	Duplicated	EOG090W0C4Z	Complete	EOG090W0DOC	Missing
EOG090W0BYQ	Duplicated	EOG090W0C5P	Missing	EOG090W0DOW	Complete
EOG090W0BYQ	Duplicated	EOG090W0C5R	Duplicated	EOG090W0DPH	Complete
EOG090W0BYS	Complete	EOG090W0C5R	Duplicated	EOG090W0DPS	Complete
EOG090W0BZ2	Complete	EOG090W0C5V	Complete	EOG090W0DPV	Complete
EOG090W0BZ3	Complete	EOG090W0C66	Complete	EOG090W0DR2	Complete
EOG090W0C06	Duplicated	EOG090W0C7E	Complete	EOG090W0DRQ	Complete
EOG090W0C06	Duplicated	EOG090W0C7L	Complete	EOG090W0DSQ	Complete
EOG090W0C06	Duplicated	EOG090W0C7S	Complete	EOG090W0DUL	Complete
EOG090W0C07	Duplicated	EOG090W0C7T	Complete	EOG090W0DUM	Complete
EOG090W0C07	Duplicated	EOG090W0C7Z	Complete	EOG090W0DUR	Complete
EOG090W0C0H	Complete	EOG090W0C83	Complete	EOG090W0DVL	Complete
EOG090W0C2I	Complete	EOG090W0C86	Complete	EOG090W0DVM	Complete
EOG090W0C2W	Duplicated	EOG090W0C8B	Complete	EOG090W0DVP	Complete
EOG090W0C2W	Duplicated	EOG090W0C9K	Complete	EOG090W0DW4	Complete
EOG090W0C2W	Duplicated	EOG090W0CAH	Complete	EOG090W0DW8	Complete
EOG090W0C2X	Complete	EOG090W0CAR	Complete	EOG090W0DWH	Complete
EOG090W0C3I	Complete	EOG090W0CB4	Complete	EOG090W0DWN	Complete
EOG090W0C3P	Complete	EOG090W0CBA	Complete	EOG090W0DWO	Complete
EOG090W0C4Z	Complete	EOG090W0CBB	Complete	EOG090W0DY3	Complete
EOG090W0C5P	Missing	EOG090W0CBD	Complete	EOG090W0DY4	Complete
EOG090W0C5R	Duplicated	EOG090W0CBZ	Complete	EOG090W0DY7	Fragmented
EOG090W0C5R	Duplicated	EOG090W0CCI	Fragmented	EOG090W0DYP	Complete
EOG090W0C5R	Duplicated	EOG090W0CCL	Complete	EOG090W0DZ1	Complete
EOG090W0C5V	Complete	EOG090W0CCX	Fragmented	EOG090W0DZ4	Complete
EOG090W0C66	Complete	EOG090W0CD1	Duplicated	EOG090W0DZ9	Complete
EOG090W0C7E	Complete	EOG090W0CD1	Duplicated	EOG090W0E00	Fragmented
EOG090W0C7L	Complete	EOG090W0CDV	Complete	EOG090W0E07	Complete
EOG090W0C7S	Complete	EOG090W0CFA	Fragmented	EOG090W0E0O	Complete
EOG090W0C7T	Complete	EOG090W0CFQ	Complete	EOG090W0E0R	Complete
EOG090W0C7Z	Complete	EOG090W0CG0	Complete	EOG090W0E1Z	Complete
EOG090W0C83	Complete	EOG090W0CGD	Duplicated	EOG090W0E21	Complete
EOG090W0C86	Complete	EOG090W0CGD	Duplicated	EOG090W0E4P	Complete
EOG090W0C8B	Complete	EOG090W0CGD	Duplicated	EOG090W0E4R	Complete
EOG090W0C9K	Complete	EOG090W0CHN	Complete	EOG090W0E4W	Complete
EOG090W0CAH	Complete	EOG090W0CHQ	Complete	EOG090W0E59	Fragmented
EOG090W0CAR	Complete	EOG090W0CI3	Fragmented	EOG090W0E5G	Complete
EOG090W0CB4	Complete	EOG090W0CIU	Complete	EOG090W0E64	Complete
EOG090W0CBA	Complete	EOG090W0CJ5	Complete	EOG090W0E6K	Complete
EOG090W0CBB	Complete	EOG090W0CK8	Complete	EOG090W0E7H	Complete
EOG090W0CBD	Complete	EOG090W0CKZ	Missing	EOG090W0E7X	Complete
EOG090W0CBZ	Complete	EOG090W0CL8	Complete	EOG090W0E8S	Complete
EOG090W0CCI	Fragmented	EOG090W0CLA	Complete	EOG090W0E9A	Complete
EOG090W0CCL	Complete	EOG090W0CLF	Duplicated	EOG090W0EBA	Complete
EOG090W0CCX	Fragmented	EOG090W0CLF	Duplicated	EOG090W0EBZ	Complete
EOG090W0CD1	Complete	EOG090W0CLI	Fragmented	EOG090W0EC2	Complete
EOG090W0CDV	Complete	EOG090W0CMD	Complete	EOG090W0EDI	Complete
EOG090W0CFA	Fragmented	EOG090W0CME	Fragmented	EOG090W0EDZ	Complete
EOG090W0CFQ	Complete	EOG090W0CMI	Complete	EOG090W0EE8	Complete
EOG090W0CG0	Complete	EOG090W0CMM	Complete	EOG090W0EEB	Complete
EOG090W0CGD	Duplicated	EOG090W0CMO	Complete	EOG090W0EEE	Fragmented
EOG090W0CGD	Duplicated	EOG090W0CN5	Complete	EOG090W0EFD	Complete
EOG090W0CHN	Complete	EOG090W0CNN	Fragmented	EOG090W0EFH	Complete
EOG090W0CHQ	Complete	EOG090W0COH	Duplicated	EOG090W0EFL	Complete
EOG090W0CI3	Fragmented	EOG090W0COH	Duplicated	EOG090W0EG5	Complete
EOG090W0CIU	Complete	EOG090W0COH	Duplicated	EOG090W0EG7	Complete
EOG090W0CJ5	Complete	EOG090W0CQ9	Complete	EOG090W0EGW	Complete
EOG090W0CK8	Complete	EOG090W0CQO	Complete	EOG090W0EHZ	Complete
EOG090W0CKZ	Complete	EOG090W0CRH	Complete	EOG090W0EIQ	Complete
EOG090W0CL8	Complete	EOG090W0CRK	Complete	EOG090W0EIW	Complete
EOG090W0CLA	Complete	EOG090W0CRM	Complete	EOG090W0EJ0	Complete
EOG090W0CLF	Complete	EOG090W0CS7	Fragmented	EOG090W0EJV	Complete
EOG090W0CLI	Complete	EOG090W0CS8	Complete	EOG090W0EK3	Complete
EOG090W0CMD	Complete	EOG090W0CSI	Fragmented	EOG090W0ELP	Complete
EOG090W0CME	Fragmented	EOG090W0CTN	Duplicated	EOG090W0EM5	Missing
EOG090W0CMI	Complete	EOG090W0CTN	Duplicated	EOG090W0ENT	Complete
EOG090W0CMM	Fragmented	EOG090W0CTN	Duplicated	EOG090W0EOF	Complete
EOG090W0CMO	Complete	EOG090W0CUM	Complete	EOG090W0EON	Complete
EOG090W0CN5	Complete	EOG090W0CVF	Complete	EOG090W0EP5	Complete
EOG090W0CNN	Fragmented	EOG090W0CW6	Fragmented	EOG090W0EPV	Missing
EOG090W0COH	Duplicated	EOG090W0CYA	Complete	EOG090W0EQA	Complete
EOG090W0COH	Duplicated	EOG090W0CYG	Duplicated	EOG090W0ERD	Complete
EOG090W0CQ9	Complete	EOG090W0CYG	Duplicated	EOG090W0ERR	Complete
EOG090W0CQO	Complete	EOG090W0CZC	Complete	EOG090W0ESN	Fragmented
EOG090W0CRH	Complete	EOG090W0CZI	Complete	EOG090W0ESV	Complete
EOG090W0CRK	Complete	EOG090W0CZK	Fragmented	EOG090W0ET7	Complete
EOG090W0CRM	Duplicated	EOG090W0D0E	Complete	EOG090W0ETF	Complete
EOG090W0CRM	Duplicated	EOG090W0D21	Complete	EOG090W0EU2	Complete
EOG090W0CRM	Duplicated	EOG090W0D2Y	Complete	EOG090W0EUN	Complete
EOG090W0CS7	Complete	EOG090W0D3K	Duplicated	EOG090W0EVR	Duplicated
EOG090W0CS8	Complete	EOG090W0D3K	Duplicated	EOG090W0EVR	Duplicated
EOG090W0CSI	Fragmented	EOG090W0D3K	Duplicated	EOG090W0EW0	Complete
EOG090W0CTN	Duplicated	EOG090W0D56	Complete	EOG090W0EWS	Complete
EOG090W0CTN	Duplicated	EOG090W0D5A	Complete	EOG090W0EWT	Complete
EOG090W0CUM	Complete	EOG090W0D5E	Complete	EOG090W0EXV	Complete
EOG090W0CVF	Complete	EOG090W0D62	Complete	EOG090W0EY0	Complete
EOG090W0CW6	Fragmented	EOG090W0D6S	Complete	EOG090W0EYT	Complete
EOG090W0CYA	Complete	EOG090W0D73	Duplicated	EOG090W0EZ6	Complete
EOG090W0CYG	Complete	EOG090W0D73	Duplicated	EOG090W0EZ8	Complete
EOG090W0CZC	Complete	EOG090W0D73	Duplicated	EOG090W0EZR	Fragmented
EOG090W0CZI	Complete	EOG090W0D7J	Missing	EOG090W0EZW	Complete
EOG090W0CZK	Fragmented	EOG090W0DA8	Fragmented	EOG090W0F00	Complete
EOG090W0D0E	Complete	EOG090W0DAB	Duplicated	EOG090W0F0K	Complete
EOG090W0D21	Complete	EOG090W0DAB	Duplicated	EOG090W0F0L	Complete
EOG090W0D2Y	Complete	EOG090W0DAB	Duplicated	EOG090W0F1A	Complete
EOG090W0D3K	Complete	EOG090W0DAF	Fragmented	EOG090W0F1C	Complete
EOG090W0D56	Complete	EOG090W0DAR	Complete	EOG090W0F1E	Complete
EOG090W0D5A	Fragmented	EOG090W0DAS	Duplicated	EOG090W0F27	Complete
EOG090W0D5E	Complete	EOG090W0DAS	Duplicated	EOG090W0F29	Complete
EOG090W0D62	Complete	EOG090W0DAS	Duplicated	EOG090W0F2J	Complete
EOG090W0D6S	Complete	EOG090W0DB5	Fragmented	EOG090W0F2Q	Complete
EOG090W0D73	Duplicated	EOG090W0DBH	Complete	EOG090W0F3D	Missing
EOG090W0D73	Duplicated	EOG090W0DBJ	Duplicated	EOG090W0F3N	Complete
EOG090W0D73	Duplicated	EOG090W0DBJ	Duplicated	EOG090W0F43	Fragmented
EOG090W0D7J	Missing	EOG090W0DBJ	Duplicated	EOG090W0F4B	Complete
EOG090W0DA8	Fragmented	EOG090W0DD5	Complete	EOG090W0F5G	Complete
EOG090W0DAB	Duplicated	EOG090W0DDM	Complete	EOG090W0F78	Complete
EOG090W0DAB	Duplicated	EOG090W0DE3	Complete	EOG090W0F7H	Complete
EOG090W0DAB	Duplicated	EOG090W0DEY	Complete	EOG090W0F7U	Complete
EOG090W0DAF	Fragmented	EOG090W0DF8	Complete	EOG090W0F7W	Complete
EOG090W0DAR	Complete	EOG090W0DFD	Complete	EOG090W0F8A	Complete
EOG090W0DAS	Complete	EOG090W0DFY	Complete	EOG090W0F8P	Complete
EOG090W0DB5	Fragmented	EOG090W0DGR	Duplicated	EOG090W0F8Q	Complete
EOG090W0DBH	Complete	EOG090W0DGR	Duplicated	EOG090W0F93	Complete
EOG090W0DBJ	Duplicated	EOG090W0DGR	Duplicated	EOG090W0F9A	Complete
EOG090W0DBJ	Duplicated	EOG090W0DHR	Complete	EOG090W0F9G	Complete
EOG090W0DBJ	Duplicated	EOG090W0DJ4	Complete	EOG090W0F9J	Complete
EOG090W0DD5	Complete	EOG090W0DJ7	Complete	EOG090W0F9K	Fragmented
EOG090W0DDM	Complete	EOG090W0DJI	Complete	EOG090W0FAJ	Complete
EOG090W0DE3	Complete	EOG090W0DJM	Complete	EOG090W0FCL	Complete
EOG090W0DEY	Duplicated	EOG090W0DJY	Complete	EOG090W0FD0	Complete
EOG090W0DEY	Duplicated	EOG090W0DK9	Complete	EOG090W0FDR	Fragmented
EOG090W0DF8	Complete	EOG090W0DKY	Complete	EOG090W0FE7	Complete
EOG090W0DFD	Complete	EOG090W0DLD	Complete	EOG090W0FEF	Complete
EOG090W0DFY	Fragmented	EOG090W0DM3	Fragmented	EOG090W0FEP	Complete
EOG090W0DGR	Complete	EOG090W0DMC	Complete	EOG090W0FEU	Complete
EOG090W0DHR	Complete	EOG090W0DMH	Duplicated	EOG090W0FF8	Fragmented
EOG090W0DJ4	Complete	EOG090W0DMH	Duplicated	EOG090W0FFP	Complete
EOG090W0DJ7	Complete	EOG090W0DNL	Complete	EOG090W0FG5	Fragmented
EOG090W0DJI	Duplicated	EOG090W0DNM	Duplicated	EOG090W0FGL	Complete
EOG090W0DJI	Duplicated	EOG090W0DNM	Duplicated	EOG090W0FGQ	Complete
EOG090W0DJI	Duplicated	EOG090W0DNM	Duplicated	EOG090W0FGU	Complete
EOG090W0DJM	Complete	EOG090W0DOC	Fragmented	EOG090W0FH5	Complete
EOG090W0DJY	Duplicated	EOG090W0DOW	Complete	EOG090W0FI9	Complete
EOG090W0DJY	Duplicated	EOG090W0DPH	Fragmented	EOG090W0FIE	Complete
EOG090W0DJY	Duplicated	EOG090W0DPS	Complete	EOG090W0FIH	Complete
EOG090W0DK9	Complete	EOG090W0DPV	Duplicated	EOG090W0FIQ	Missing
EOG090W0DKY	Complete	EOG090W0DPV	Duplicated	EOG090W0FJE	Fragmented
EOG090W0DLD	Complete	EOG090W0DPV	Duplicated	EOG090W0FK1	Fragmented
EOG090W0DM3	Fragmented	EOG090W0DR2	Complete	EOG090W0FKG	Complete
EOG090W0DMC	Fragmented	EOG090W0DRQ	Complete	EOG090W0FKO	Complete
EOG090W0DMH	Complete	EOG090W0DSQ	Complete	EOG090W0FLB	Complete
EOG090W0DNL	Complete	EOG090W0DUL	Fragmented	EOG090W0FNV	Complete
EOG090W0DNM	Duplicated	EOG090W0DUM	Complete	EOG090W0FO6	Complete
EOG090W0DNM	Duplicated	EOG090W0DUR	Complete	EOG090W0FOK	Complete
EOG090W0DNM	Duplicated	EOG090W0DVL	Complete	EOG090W0FOM	Complete
EOG090W0DOC	Fragmented	EOG090W0DVM	Complete	EOG090W0FOY	Complete
EOG090W0DOW	Complete	EOG090W0DVP	Complete	EOG090W0FPL	Complete
EOG090W0DPH	Fragmented	EOG090W0DW4	Fragmented	EOG090W0FQ4	Complete
EOG090W0DPS	Complete	EOG090W0DW8	Complete	EOG090W0FQ8	Fragmented
EOG090W0DPV	Duplicated	EOG090W0DWH	Duplicated	EOG090W0FQ9	Complete
EOG090W0DPV	Duplicated	EOG090W0DWH	Duplicated	EOG090W0FQT	Complete
EOG090W0DR2	Complete	EOG090W0DWN	Complete	EOG090W0FR1	Complete
EOG090W0DRQ	Complete	EOG090W0DWO	Complete	EOG090W0FRZ	Complete
EOG090W0DSQ	Complete	EOG090W0DY3	Complete	EOG090W0FS1	Complete
EOG090W0DUL	Fragmented	EOG090W0DY4	Complete	EOG090W0FS2	Complete
EOG090W0DUM	Complete	EOG090W0DY7	Fragmented	EOG090W0FS4	Complete
EOG090W0DUR	Complete	EOG090W0DYP	Complete	EOG090W0FSZ	Complete
EOG090W0DVL	Complete	EOG090W0DZ1	Complete	EOG090W0FU7	Complete
EOG090W0DVM	Complete	EOG090W0DZ4	Fragmented	EOG090W0FVD	Complete
EOG090W0DVP	Complete	EOG090W0DZ9	Complete	EOG090W0FVI	Complete
EOG090W0DW4	Fragmented	EOG090W0E00	Complete	EOG090W0FWF	Complete
EOG090W0DW8	Complete	EOG090W0E07	Complete	EOG090W0FXN	Complete
EOG090W0DWH	Duplicated	EOG090W0E0O	Fragmented	EOG090W0FYA	Complete
EOG090W0DWH	Duplicated	EOG090W0E0R	Complete	EOG090W0FYB	Complete
EOG090W0DWH	Duplicated	EOG090W0E1Z	Duplicated	EOG090W0FYR	Complete
EOG090W0DWN	Complete	EOG090W0E1Z	Duplicated	EOG090W0FZ2	Complete
EOG090W0DWO	Complete	EOG090W0E1Z	Duplicated	EOG090W0FZE	Complete
EOG090W0DY3	Complete	EOG090W0E21	Fragmented	EOG090W0FZO	Complete
EOG090W0DY4	Complete	EOG090W0E4P	Complete	EOG090W0G0K	Fragmented
EOG090W0DY7	Fragmented	EOG090W0E4R	Complete	EOG090W0G0Z	Complete
EOG090W0DYP	Complete	EOG090W0E4W	Duplicated	EOG090W0G1I	Complete
EOG090W0DZ1	Complete	EOG090W0E4W	Duplicated	EOG090W0G22	Complete
EOG090W0DZ4	Fragmented	EOG090W0E59	Complete	EOG090W0G2P	Complete
EOG090W0DZ9	Complete	EOG090W0E5G	Complete	EOG090W0G2U	Complete
EOG090W0E00	Duplicated	EOG090W0E64	Fragmented	EOG090W0G3P	Complete
EOG090W0E00	Duplicated	EOG090W0E6K	Complete	EOG090W0G4V	Complete
EOG090W0E07	Complete	EOG090W0E7H	Complete	EOG090W0G5G	Complete
EOG090W0E0O	Fragmented	EOG090W0E7X	Complete	EOG090W0G5Y	Complete
EOG090W0E0R	Complete	EOG090W0E8S	Fragmented	EOG090W0G6B	Complete
EOG090W0E1Z	Complete	EOG090W0E9A	Complete	EOG090W0G6X	Complete
EOG090W0E21	Complete	EOG090W0EBA	Missing	EOG090W0G88	Fragmented
EOG090W0E4P	Complete	EOG090W0EBZ	Fragmented	EOG090W0G8E	Complete
EOG090W0E4R	Complete	EOG090W0EC2	Complete	EOG090W0G9H	Complete
EOG090W0E4W	Complete	EOG090W0EDI	Complete	EOG090W0G9S	Complete
EOG090W0E59	Fragmented	EOG090W0EDZ	Complete	EOG090W0GA9	Complete
EOG090W0E5G	Complete	EOG090W0EE8	Duplicated	EOG090W0GBK	Complete
EOG090W0E64	Fragmented	EOG090W0EE8	Duplicated	EOG090W0GBR	Fragmented
EOG090W0E6K	Complete	EOG090W0EEB	Complete	EOG090W0GDE	Complete
EOG090W0E7H	Complete	EOG090W0EEE	Fragmented	EOG090W0GDV	Complete
EOG090W0E7X	Complete	EOG090W0EFD	Complete	EOG090W0GED	Complete
EOG090W0E8S	Fragmented	EOG090W0EFH	Fragmented	EOG090W0GEL	Complete
EOG090W0E9A	Complete	EOG090W0EFL	Fragmented	EOG090W0GG5	Complete
EOG090W0EBA	Complete	EOG090W0EG5	Complete	EOG090W0GG7	Complete
EOG090W0EBZ	Fragmented	EOG090W0EG7	Fragmented	EOG090W0GI3	Complete
EOG090W0EC2	Complete	EOG090W0EGW	Complete	EOG090W0GIV	Complete
EOG090W0EDI	Complete	EOG090W0EHZ	Complete	EOG090W0GJX	Complete
EOG090W0EDZ	Complete	EOG090W0EIQ	Fragmented	EOG090W0GK7	Complete
EOG090W0EE8	Complete	EOG090W0EIW	Complete	EOG090W0GKN	Complete
EOG090W0EEB	Complete	EOG090W0EJ0	Complete	EOG090W0GKU	Complete
EOG090W0EEE	Fragmented	EOG090W0EJV	Complete	EOG090W0GKW	Missing
EOG090W0EFD	Complete	EOG090W0EK3	Complete	EOG090W0GL6	Complete
EOG090W0EFH	Fragmented	EOG090W0ELP	Complete	EOG090W0GLZ	Complete
EOG090W0EFL	Complete	EOG090W0EM5	Missing	EOG090W0GM2	Complete
EOG090W0EG5	Complete	EOG090W0ENT	Complete	EOG090W0GM3	Complete
EOG090W0EG7	Fragmented	EOG090W0EOF	Complete	EOG090W0GM5	Complete
EOG090W0EGW	Duplicated	EOG090W0EON	Complete	EOG090W0GMG	Missing
EOG090W0EGW	Duplicated	EOG090W0EP5	Complete	EOG090W0GMR	Complete
EOG090W0EGW	Duplicated	EOG090W0EPV	Missing	EOG090W0GNE	Complete
EOG090W0EHZ	Duplicated	EOG090W0EQA	Complete	EOG090W0GNI	Complete
EOG090W0EHZ	Duplicated	EOG090W0ERD	Complete	EOG090W0GOL	Complete
EOG090W0EIQ	Fragmented	EOG090W0ERR	Complete	EOG090W0GP3	Complete
EOG090W0EIW	Complete	EOG090W0ESN	Fragmented	EOG090W0GP5	Complete
EOG090W0EJ0	Complete	EOG090W0ESV	Complete	EOG090W0GPQ	Complete
EOG090W0EJV	Complete	EOG090W0ET7	Complete	EOG090W0GQZ	Complete
EOG090W0EK3	Complete	EOG090W0ETF	Duplicated	EOG090W0GR5	Complete
EOG090W0ELP	Complete	EOG090W0ETF	Duplicated	EOG090W0GT9	Complete
EOG090W0EM5	Missing	EOG090W0EU2	Complete	EOG090W0GV1	Complete
EOG090W0ENT	Complete	EOG090W0EUN	Fragmented	EOG090W0GV9	Complete
EOG090W0EOF	Complete	EOG090W0EVR	Complete	EOG090W0GVL	Fragmented
EOG090W0EON	Complete	EOG090W0EW0	Complete	EOG090W0GW4	Duplicated
EOG090W0EP5	Complete	EOG090W0EWS	Complete	EOG090W0GW4	Duplicated
EOG090W0EPV	Missing	EOG090W0EWT	Complete	EOG090W0GW4	Duplicated
EOG090W0EQA	Complete	EOG090W0EXV	Complete	EOG090W0GWE	Complete
EOG090W0ERD	Complete	EOG090W0EY0	Complete	EOG090W0GWN	Complete
EOG090W0ERR	Complete	EOG090W0EYT	Complete	EOG090W0GWR	Complete
EOG090W0ESN	Fragmented	EOG090W0EZ6	Complete	EOG090W0GWS	Complete
EOG090W0ESV	Complete	EOG090W0EZ8	Complete	EOG090W0GX6	Complete
EOG090W0ET7	Duplicated	EOG090W0EZR	Fragmented	EOG090W0GYE	Complete
EOG090W0ET7	Duplicated	EOG090W0EZW	Complete	EOG090W0GZA	Complete
EOG090W0ET7	Duplicated	EOG090W0F00	Complete	EOG090W0GZQ	Complete
EOG090W0ETF	Duplicated	EOG090W0F0K	Complete	EOG090W0H11	Complete
EOG090W0ETF	Duplicated	EOG090W0F0L	Complete	EOG090W0H21	Complete
EOG090W0EU2	Complete	EOG090W0F1A	Complete	EOG090W0H25	Complete
EOG090W0EUN	Complete	EOG090W0F1C	Complete	EOG090W0H3N	Fragmented
EOG090W0EVR	Duplicated	EOG090W0F1E	Complete	EOG090W0H52	Complete
EOG090W0EVR	Duplicated	EOG090W0F27	Duplicated	EOG090W0H5I	Complete
EOG090W0EW0	Complete	EOG090W0F27	Duplicated	EOG090W0H5T	Complete
EOG090W0EWS	Complete	EOG090W0F29	Duplicated	EOG090W0H63	Complete
EOG090W0EWT	Complete	EOG090W0F29	Duplicated	EOG090W0H6Q	Complete
EOG090W0EXV	Fragmented	EOG090W0F2J	Complete	EOG090W0H6T	Complete
EOG090W0EY0	Complete	EOG090W0F2Q	Complete	EOG090W0H7C	Complete
EOG090W0EYT	Complete	EOG090W0F3D	Missing	EOG090W0H7Q	Fragmented
EOG090W0EZ6	Complete	EOG090W0F3N	Complete	EOG090W0H7U	Complete
EOG090W0EZ8	Duplicated	EOG090W0F43	Missing	EOG090W0H8N	Complete
EOG090W0EZ8	Duplicated	EOG090W0F4B	Complete	EOG090W0H98	Complete
EOG090W0EZR	Fragmented	EOG090W0F5G	Complete	EOG090W0H9K	Complete
EOG090W0EZW	Complete	EOG090W0F78	Complete	EOG090W0HAD	Complete
EOG090W0F00	Complete	EOG090W0F7H	Complete	EOG090W0HCB	Complete
EOG090W0F0K	Complete	EOG090W0F7U	Complete	EOG090W0HCM	Complete
EOG090W0F0L	Complete	EOG090W0F7W	Complete	EOG090W0HD2	Complete
EOG090W0F1A	Complete	EOG090W0F8A	Complete	EOG090W0HDN	Complete
EOG090W0F1C	Complete	EOG090W0F8P	Complete	EOG090W0HDY	Complete
EOG090W0F1E	Complete	EOG090W0F8Q	Complete	EOG090W0HFV	Complete
EOG090W0F27	Duplicated	EOG090W0F93	Complete	EOG090W0HGU	Complete
EOG090W0F27	Duplicated	EOG090W0F9A	Complete	EOG090W0HH1	Complete
EOG090W0F29	Duplicated	EOG090W0F9G	Complete	EOG090W0HHE	Complete
EOG090W0F29	Duplicated	EOG090W0F9J	Complete	EOG090W0HHV	Complete
EOG090W0F2J	Duplicated	EOG090W0F9K	Complete	EOG090W0HIX	Complete
EOG090W0F2J	Duplicated	EOG090W0FAJ	Complete	EOG090W0HJK	Complete
EOG090W0F2Q	Complete	EOG090W0FCL	Complete	EOG090W0HKZ	Complete
EOG090W0F3D	Missing	EOG090W0FD0	Complete	EOG090W0HM3	Complete
EOG090W0F3N	Complete	EOG090W0FDR	Duplicated	EOG090W0HNK	Complete
EOG090W0F43	Missing	EOG090W0FDR	Duplicated	EOG090W0HNV	Complete
EOG090W0F4B	Complete	EOG090W0FE7	Duplicated	EOG090W0HOE	Complete
EOG090W0F5G	Complete	EOG090W0FE7	Duplicated	EOG090W0HOS	Complete
EOG090W0F78	Complete	EOG090W0FEF	Duplicated	EOG090W0HP8	Fragmented
EOG090W0F7H	Complete	EOG090W0FEF	Duplicated	EOG090W0HRE	Fragmented
EOG090W0F7U	Complete	EOG090W0FEP	Complete	EOG090W0HST	Complete
EOG090W0F7W	Complete	EOG090W0FEU	Complete	EOG090W0HTD	Complete
EOG090W0F8A	Complete	EOG090W0FF8	Complete	EOG090W0HTF	Complete
EOG090W0F8P	Complete	EOG090W0FFP	Complete	EOG090W0HU1	Complete
EOG090W0F8Q	Complete	EOG090W0FG5	Fragmented	EOG090W0HUW	Complete
EOG090W0F93	Complete	EOG090W0FGL	Fragmented	EOG090W0HW1	Complete
EOG090W0F9A	Complete	EOG090W0FGQ	Complete	EOG090W0HWB	Complete
EOG090W0F9G	Complete	EOG090W0FGU	Complete	EOG090W0HWT	Complete
EOG090W0F9J	Complete	EOG090W0FH5	Complete	EOG090W0HX4	Complete
EOG090W0F9K	Complete	EOG090W0FI9	Complete	EOG090W0HX7	Complete
EOG090W0FAJ	Complete	EOG090W0FIE	Fragmented	EOG090W0HXF	Complete
EOG090W0FCL	Complete	EOG090W0FIH	Duplicated	EOG090W0HXS	Complete
EOG090W0FD0	Complete	EOG090W0FIH	Duplicated	EOG090W0HXZ	Complete
EOG090W0FDR	Missing	EOG090W0FIH	Duplicated	EOG090W0HY7	Complete
EOG090W0FE7	Duplicated	EOG090W0FIQ	Missing	EOG090W0HYK	Complete
EOG090W0FE7	Duplicated	EOG090W0FJE	Fragmented	EOG090W0HYT	Complete
EOG090W0FEF	Duplicated	EOG090W0FK1	Fragmented	EOG090W0I0Q	Missing
EOG090W0FEF	Duplicated	EOG090W0FKG	Complete	EOG090W0I0X	Complete
EOG090W0FEP	Complete	EOG090W0FKO	Complete	EOG090W0I1T	Complete
EOG090W0FEU	Complete	EOG090W0FLB	Complete	EOG090W0I2Q	Complete
EOG090W0FF8	Missing	EOG090W0FNV	Complete	EOG090W0I37	Complete
EOG090W0FFP	Complete	EOG090W0FO6	Complete	EOG090W0I5I	Duplicated
EOG090W0FG5	Fragmented	EOG090W0FOK	Complete	EOG090W0I5I	Duplicated
EOG090W0FGL	Fragmented	EOG090W0FOM	Complete	EOG090W0I6P	Complete
EOG090W0FGQ	Complete	EOG090W0FOY	Fragmented	EOG090W0I6V	Fragmented
EOG090W0FGU	Complete	EOG090W0FPL	Complete	EOG090W0I7M	Complete
EOG090W0FH5	Complete	EOG090W0FQ4	Complete	EOG090W0I8J	Complete
EOG090W0FI9	Complete	EOG090W0FQ8	Missing	EOG090W0I8N	Complete
EOG090W0FIE	Complete	EOG090W0FQ9	Complete	EOG090W0I97	Complete
EOG090W0FIH	Duplicated	EOG090W0FQT	Duplicated	EOG090W0IBI	Complete
EOG090W0FIH	Duplicated	EOG090W0FQT	Duplicated	EOG090W0IBV	Complete
EOG090W0FIH	Duplicated	EOG090W0FQT	Duplicated	EOG090W0ICU	Complete
EOG090W0FIQ	Missing	EOG090W0FR1	Complete	EOG090W0IEE	Complete
EOG090W0FJE	Fragmented	EOG090W0FRZ	Complete	EOG090W0IEY	Complete
EOG090W0FK1	Fragmented	EOG090W0FS1	Complete	EOG090W0IF2	Complete
EOG090W0FKG	Complete	EOG090W0FS2	Complete	EOG090W0IFM	Complete
EOG090W0FKO	Complete	EOG090W0FS4	Fragmented	EOG090W0IGS	Complete
EOG090W0FLB	Duplicated	EOG090W0FSZ	Complete	EOG090W0IH3	Complete
EOG090W0FLB	Duplicated	EOG090W0FU7	Fragmented	EOG090W0IHB	Complete
EOG090W0FNV	Complete	EOG090W0FVD	Fragmented	EOG090W0IIA	Missing
EOG090W0FO6	Complete	EOG090W0FVI	Fragmented	EOG090W0IIS	Complete
EOG090W0FOK	Complete	EOG090W0FWF	Complete	EOG090W0IKC	Complete
EOG090W0FOM	Complete	EOG090W0FXN	Fragmented	EOG090W0IMT	Complete
EOG090W0FOY	Complete	EOG090W0FYA	Fragmented	EOG090W0INN	Complete
EOG090W0FPL	Complete	EOG090W0FYB	Missing	EOG090W0IO1	Complete
EOG090W0FQ4	Complete	EOG090W0FYR	Complete	EOG090W0IOD	Complete
EOG090W0FQ8	Fragmented	EOG090W0FZ2	Complete	EOG090W0IP7	Fragmented
EOG090W0FQ9	Complete	EOG090W0FZE	Missing	EOG090W0IPB	Complete
EOG090W0FQT	Duplicated	EOG090W0FZO	Complete	EOG090W0IQT	Complete
EOG090W0FQT	Duplicated	EOG090W0G0K	Complete	EOG090W0IS9	Complete
EOG090W0FR1	Complete	EOG090W0G0Z	Complete	EOG090W0ITG	Fragmented
EOG090W0FRZ	Complete	EOG090W0G1I	Complete	EOG090W0ITI	Complete
EOG090W0FS1	Complete	EOG090W0G22	Complete	EOG090W0IUR	Complete
EOG090W0FS2	Complete	EOG090W0G2P	Complete	EOG090W0IVU	Complete
EOG090W0FS4	Fragmented	EOG090W0G2U	Complete	EOG090W0IW0	Complete
EOG090W0FSZ	Complete	EOG090W0G3P	Complete	EOG090W0IYN	Complete
EOG090W0FU7	Complete	EOG090W0G4V	Fragmented	EOG090W0IZB	Complete
EOG090W0FVD	Fragmented	EOG090W0G5G	Complete	EOG090W0J06	Complete
EOG090W0FVI	Fragmented	EOG090W0G5Y	Complete	EOG090W0J0Y	Missing
EOG090W0FWF	Complete	EOG090W0G6B	Complete	EOG090W0J0Z	Complete
EOG090W0FXN	Duplicated	EOG090W0G6X	Complete	EOG090W0J1J	Complete
EOG090W0FXN	Duplicated	EOG090W0G88	Fragmented	EOG090W0J37	Complete
EOG090W0FXN	Duplicated	EOG090W0G8E	Complete	EOG090W0J3P	Missing
EOG090W0FYA	Fragmented	EOG090W0G9H	Complete	EOG090W0J3Q	Complete
EOG090W0FYB	Missing	EOG090W0G9S	Complete	EOG090W0J3R	Complete
EOG090W0FYR	Complete	EOG090W0GA9	Complete	EOG090W0J57	Complete
EOG090W0FZ2	Complete	EOG090W0GBK	Complete	EOG090W0J6A	Complete
EOG090W0FZE	Fragmented	EOG090W0GBR	Fragmented	EOG090W0J6P	Complete
EOG090W0FZO	Complete	EOG090W0GDE	Complete	EOG090W0J7B	Complete
EOG090W0G0K	Fragmented	EOG090W0GDV	Complete	EOG090W0J88	Complete
EOG090W0G0Z	Complete	EOG090W0GED	Complete	EOG090W0J8V	Complete
EOG090W0G1I	Complete	EOG090W0GEL	Complete	EOG090W0J9P	Complete
EOG090W0G22	Complete	EOG090W0GG5	Complete	EOG090W0JBN	Complete
EOG090W0G2P	Complete	EOG090W0GG7	Complete	EOG090W0JDA	Complete
EOG090W0G2U	Duplicated	EOG090W0GI3	Complete	EOG090W0JFZ	Complete
EOG090W0G2U	Duplicated	EOG090W0GIV	Complete	EOG090W0JH8	Complete
EOG090W0G3P	Complete	EOG090W0GJX	Complete	EOG090W0JIL	Complete
EOG090W0G4V	Complete	EOG090W0GK7	Fragmented	EOG090W0JJQ	Complete
EOG090W0G5G	Complete	EOG090W0GKN	Complete	EOG090W0JK3	Complete
EOG090W0G5Y	Complete	EOG090W0GKU	Fragmented	EOG090W0JKA	Complete
EOG090W0G6B	Complete	EOG090W0GKW	Fragmented	EOG090W0JL5	Missing
EOG090W0G6X	Complete	EOG090W0GL6	Complete	EOG090W0JLT	Complete
EOG090W0G88	Fragmented	EOG090W0GLZ	Complete	EOG090W0JMT	Complete
EOG090W0G8E	Complete	EOG090W0GM2	Complete	EOG090W0JMU	Complete
EOG090W0G9H	Complete	EOG090W0GM3	Complete	EOG090W0JMX	Complete
EOG090W0G9S	Duplicated	EOG090W0GM5	Complete	EOG090W0JN2	Complete
EOG090W0G9S	Duplicated	EOG090W0GMG	Missing	EOG090W0JN7	Complete
EOG090W0G9S	Duplicated	EOG090W0GMR	Complete	EOG090W0JOQ	Missing
EOG090W0GA9	Missing	EOG090W0GNE	Complete	EOG090W0JQ0	Complete
EOG090W0GBK	Complete	EOG090W0GNI	Fragmented	EOG090W0JRX	Complete
EOG090W0GBR	Fragmented	EOG090W0GOL	Complete	EOG090W0JS6	Complete
EOG090W0GDE	Complete	EOG090W0GP3	Complete	EOG090W0JS9	Complete
EOG090W0GDV	Duplicated	EOG090W0GP5	Complete	EOG090W0JSO	Complete
EOG090W0GDV	Duplicated	EOG090W0GPQ	Complete	EOG090W0JST	Complete
EOG090W0GDV	Duplicated	EOG090W0GQZ	Complete	EOG090W0JXV	Complete
EOG090W0GED	Complete	EOG090W0GR5	Complete	EOG090W0JXW	Complete
EOG090W0GEL	Complete	EOG090W0GT9	Duplicated	EOG090W0JYJ	Complete
EOG090W0GG5	Complete	EOG090W0GT9	Duplicated	EOG090W0JYN	Complete
EOG090W0GG7	Complete	EOG090W0GV1	Complete	EOG090W0JZ5	Complete
EOG090W0GI3	Complete	EOG090W0GV9	Complete	EOG090W0K04	Complete
EOG090W0GIV	Complete	EOG090W0GVL	Fragmented	EOG090W0K07	Complete
EOG090W0GJX	Complete	EOG090W0GW4	Complete	EOG090W0K2G	Complete
EOG090W0GK7	Fragmented	EOG090W0GWE	Complete	EOG090W0K4Q	Complete
EOG090W0GKN	Complete	EOG090W0GWN	Complete	EOG090W0K4X	Complete
EOG090W0GKU	Fragmented	EOG090W0GWR	Complete	EOG090W0K51	Complete
EOG090W0GKW	Fragmented	EOG090W0GWS	Complete	EOG090W0K5K	Complete
EOG090W0GL6	Complete	EOG090W0GX6	Complete	EOG090W0K6A	Complete
EOG090W0GLZ	Complete	EOG090W0GYE	Complete	EOG090W0K88	Complete
EOG090W0GM2	Missing	EOG090W0GZA	Complete	EOG090W0KFR	Complete
EOG090W0GM3	Complete	EOG090W0GZQ	Complete	EOG090W0KFZ	Complete
EOG090W0GM5	Complete	EOG090W0H11	Complete	EOG090W0KI5	Complete
EOG090W0GMG	Fragmented	EOG090W0H21	Complete	EOG090W0KIU	Complete
EOG090W0GMR	Complete	EOG090W0H25	Complete	EOG090W0KJ3	Complete
EOG090W0GNE	Complete	EOG090W0H3N	Fragmented	EOG090W0KJA	Complete
EOG090W0GNI	Fragmented	EOG090W0H52	Complete	EOG090W0KKV	Complete
EOG090W0GOL	Complete	EOG090W0H5I	Duplicated	EOG090W0KLR	Complete
EOG090W0GP3	Complete	EOG090W0H5I	Duplicated	EOG090W0KMC	Complete
EOG090W0GP5	Complete	EOG090W0H5I	Duplicated	EOG090W0KP0	Complete
EOG090W0GPQ	Complete	EOG090W0H5T	Complete	EOG090W0KR6	Complete
EOG090W0GQZ	Complete	EOG090W0H63	Complete	EOG090W0KS3	Complete
EOG090W0GR5	Complete	EOG090W0H6Q	Complete	EOG090W0KV4	Complete
EOG090W0GT9	Complete	EOG090W0H6T	Complete	EOG090W0KXF	Complete
EOG090W0GV1	Complete	EOG090W0H7C	Complete	EOG090W0L1Y	Complete
EOG090W0GV9	Complete	EOG090W0H7Q	Fragmented	EOG090W0L42	Missing
EOG090W0GVL	Fragmented	EOG090W0H7U	Complete	EOG090W0L4I	Complete
EOG090W0GW4	Duplicated	EOG090W0H8N	Complete	EOG090W0L6N	Complete
EOG090W0GW4	Duplicated	EOG090W0H98	Complete	EOG090W0L7F	Complete
EOG090W0GWE	Duplicated	EOG090W0H9K	Complete	EOG090W0L89	Complete
EOG090W0GWE	Duplicated	EOG090W0HAD	Complete	EOG090W0L8E	Complete
EOG090W0GWN	Duplicated	EOG090W0HCB	Complete	EOG090W0L8P	Complete
EOG090W0GWN	Duplicated	EOG090W0HCM	Complete	EOG090W0L8W	Complete
EOG090W0GWN	Duplicated	EOG090W0HD2	Complete	EOG090W0LEN	Complete
EOG090W0GWR	Complete	EOG090W0HDN	Complete	EOG090W0LFE	Complete
EOG090W0GWS	Complete	EOG090W0HDY	Complete	EOG090W0LHU	Complete
EOG090W0GX6	Complete	EOG090W0HFV	Complete	EOG090W0LIW	Complete
EOG090W0GYE	Complete	EOG090W0HGU	Complete	EOG090W0LJ0	Complete
EOG090W0GZA	Complete	EOG090W0HH1	Complete	EOG090W0LJB	Complete
EOG090W0GZQ	Complete	EOG090W0HHE	Complete	EOG090W0LL3	Complete
EOG090W0H11	Complete	EOG090W0HHV	Complete	EOG090W0LLV	Complete
EOG090W0H21	Fragmented	EOG090W0HIX	Complete	EOG090W0LM4	Complete
EOG090W0H25	Complete	EOG090W0HJK	Complete	EOG090W0LOM	Complete
EOG090W0H3N	Fragmented	EOG090W0HKZ	Duplicated	EOG090W0LPX	Complete
EOG090W0H52	Complete	EOG090W0HKZ	Duplicated	EOG090W0LQX	Complete
EOG090W0H5I	Complete	EOG090W0HM3	Complete	EOG090W0LRN	Complete
EOG090W0H5T	Complete	EOG090W0HNK	Complete	EOG090W0LSM	Complete
EOG090W0H63	Complete	EOG090W0HNV	Complete	EOG090W0LTJ	Complete
EOG090W0H6Q	Complete	EOG090W0HOE	Complete	EOG090W0LWB	Complete
EOG090W0H6T	Complete	EOG090W0HOS	Complete	EOG090W0LWQ	Complete
EOG090W0H7C	Complete	EOG090W0HP8	Fragmented	EOG090W0M5Q	Missing
EOG090W0H7Q	Fragmented	EOG090W0HRE	Complete	EOG090W0M8F	Complete
EOG090W0H7U	Complete	EOG090W0HST	Complete	EOG090W0MBV	Complete
EOG090W0H8N	Complete	EOG090W0HTD	Complete	EOG090W0MFJ	Complete
EOG090W0H98	Complete	EOG090W0HTF	Complete	EOG090W0MFT	Complete
EOG090W0H9K	Complete	EOG090W0HU1	Complete	EOG090W0MIL	Complete
EOG090W0HAD	Complete	EOG090W0HUW	Complete	EOG090W0MK4	Complete
EOG090W0HCB	Complete	EOG090W0HW1	Complete	EOG090W0MLJ	Complete
EOG090W0HCM	Complete	EOG090W0HWB	Duplicated	EOG090W0MM4	Complete
EOG090W0HD2	Complete	EOG090W0HWB	Duplicated	EOG090W0MNZ	Complete
EOG090W0HDN	Complete	EOG090W0HWB	Duplicated	EOG090W0MYQ	Complete
EOG090W0HDY	Complete	EOG090W0HWT	Complete	EOG090W0MZQ	Complete
EOG090W0HFV	Complete	EOG090W0HX4	Complete	EOG090W0N0N	Complete
EOG090W0HGU	Complete	EOG090W0HX7	Complete	EOG090W0N4N	Complete
EOG090W0HH1	Complete	EOG090W0HXF	Complete	EOG090W0N5S	Complete
EOG090W0HHE	Complete	EOG090W0HXS	Duplicated	EOG090W0N7H	Complete
EOG090W0HHV	Complete	EOG090W0HXS	Duplicated	EOG090W0N7U	Complete
EOG090W0HIX	Complete	EOG090W0HXS	Duplicated	EOG090W0NCE	Complete
EOG090W0HJK	Complete	EOG090W0HXZ	Complete	EOG090W0NFV	Complete
EOG090W0HKZ	Duplicated	EOG090W0HY7	Complete	EOG090W0NJA	Complete
EOG090W0HKZ	Duplicated	EOG090W0HYK	Fragmented	EOG090W0NJU	Complete
EOG090W0HM3	Complete	EOG090W0HYT	Duplicated	EOG090W0NK3	Complete
EOG090W0HNK	Complete	EOG090W0HYT	Duplicated	EOG090W0NO8	Complete
EOG090W0HNV	Complete	EOG090W0I0Q	Fragmented	EOG090W0NRT	Complete
EOG090W0HOE	Complete	EOG090W0I0X	Complete	EOG090W0NTV	Missing
EOG090W0HOS	Complete	EOG090W0I1T	Duplicated	EOG090W0O4V	Duplicated
EOG090W0HP8	Fragmented	EOG090W0I1T	Duplicated	EOG090W0O4V	Duplicated
EOG090W0HRE	Fragmented	EOG090W0I2Q	Complete	EOG090W0O82	Complete
EOG090W0HST	Complete	EOG090W0I37	Duplicated	EOG090W0O88	Missing
EOG090W0HTD	Complete	EOG090W0I37	Duplicated	EOG090W0ODH	Complete
EOG090W0HTF	Complete	EOG090W0I37	Duplicated	EOG090W0OM7	Complete
EOG090W0HU1	Complete	EOG090W0I5I	Complete	EOG090W0ORD	Complete
EOG090W0HUW	Complete	EOG090W0I6P	Complete	EOG090W0ORX	Fragmented
EOG090W0HW1	Complete	EOG090W0I6V	Fragmented	EOG090W0OS5	Complete
EOG090W0HWB	Duplicated	EOG090W0I7M	Complete	EOG090W0PDB	Complete
EOG090W0HWB	Duplicated	EOG090W0I8J	Fragmented	EOG090W0PQO	Complete
EOG090W0HWT	Fragmented	EOG090W0I8N	Complete	EOG090W0PW0	Missing
EOG090W0HX4	Complete	EOG090W0I97	Complete	EOG090W0PZH	Complete
EOG090W0HX7	Complete	EOG090W0IBI	Complete	EOG090W0Q9X	Complete
EOG090W0HXF	Complete	EOG090W0IBV	Complete	EOG090W0QXM	Complete
EOG090W0HXS	Duplicated	EOG090W0ICU	Complete	EOG090W0R2X	Complete
EOG090W0HXS	Duplicated	EOG090W0IEE	Duplicated	EOG090W0RGQ	Complete
EOG090W0HXS	Duplicated	EOG090W0IEE	Duplicated	EOG090W0S6D	Complete
EOG090W0HXZ	Complete	EOG090W0IEY	Complete	EOG090W0T3K	Complete
EOG090W0HY7	Duplicated	EOG090W0IF2	Complete
EOG090W0HY7	Duplicated	EOG090W0IFM	Complete
EOG090W0HYK	Missing	EOG090W0IGS	Complete
EOG090W0HYT	Duplicated	EOG090W0IH3	Complete
EOG090W0HYT	Duplicated	EOG090W0IHB	Complete
EOG090W0I0Q	Fragmented	EOG090W0IIA	Missing
EOG090W0I0X	Fragmented	EOG090W0IIS	Complete
EOG090W0I1T	Duplicated	EOG090W0IKC	Complete
EOG090W0I1T	Duplicated	EOG090W0IMT	Complete
EOG090W0I1T	Duplicated	EOG090W0INN	Complete
EOG090W0I2Q	Complete	EOG090W0IO1	Complete
EOG090W0I37	Duplicated	EOG090W0IOD	Complete
EOG090W0I37	Duplicated	EOG090W0IP7	Fragmented
EOG090W0I5I	Duplicated	EOG090W0IPB	Complete
EOG090W0I5I	Duplicated	EOG090W0IQT	Fragmented
EOG090W0I6P	Complete	EOG090W0IS9	Missing
EOG090W0I6V	Fragmented	EOG090W0ITG	Fragmented
EOG090W0I7M	Complete	EOG090W0ITI	Complete
EOG090W0I8J	Complete	EOG090W0IUR	Complete
EOG090W0I8N	Complete	EOG090W0IVU	Complete
EOG090W0I97	Duplicated	EOG090W0IW0	Complete
EOG090W0I97	Duplicated	EOG090W0IYN	Complete
EOG090W0IBI	Complete	EOG090W0IZB	Complete
EOG090W0IBV	Complete	EOG090W0J06	Complete
EOG090W0ICU	Complete	EOG090W0J0Y	Missing
EOG090W0IEE	Duplicated	EOG090W0J0Z	Complete
EOG090W0IEE	Duplicated	EOG090W0J1J	Fragmented
EOG090W0IEY	Complete	EOG090W0J37	Complete
EOG090W0IF2	Complete	EOG090W0J3P	Missing
EOG090W0IFM	Complete	EOG090W0J3Q	Complete
EOG090W0IGS	Complete	EOG090W0J3R	Complete
EOG090W0IH3	Complete	EOG090W0J57	Complete
EOG090W0IHB	Complete	EOG090W0J6A	Complete
EOG090W0IIA	Missing	EOG090W0J6P	Complete
EOG090W0IIS	Complete	EOG090W0J7B	Complete
EOG090W0IKC	Complete	EOG090W0J88	Complete
EOG090W0IMT	Complete	EOG090W0J8V	Fragmented
EOG090W0INN	Complete	EOG090W0J9P	Complete
EOG090W0IO1	Complete	EOG090W0JBN	Fragmented
EOG090W0IOD	Complete	EOG090W0JDA	Complete
EOG090W0IP7	Fragmented	EOG090W0JFZ	Fragmented
EOG090W0IPB	Complete	EOG090W0JH8	Duplicated
EOG090W0IQT	Fragmented	EOG090W0JH8	Duplicated
EOG090W0IS9	Missing	EOG090W0JH8	Duplicated
EOG090W0ITG	Fragmented	EOG090W0JIL	Complete
EOG090W0ITI	Complete	EOG090W0JJQ	Complete
EOG090W0IUR	Duplicated	EOG090W0JK3	Complete
EOG090W0IUR	Duplicated	EOG090W0JKA	Complete
EOG090W0IVU	Complete	EOG090W0JL5	Missing
EOG090W0IW0	Complete	EOG090W0JLT	Duplicated
EOG090W0IYN	Complete	EOG090W0JLT	Duplicated
EOG090W0IZB	Complete	EOG090W0JLT	Duplicated
EOG090W0J06	Complete	EOG090W0JMT	Duplicated
EOG090W0J0Y	Missing	EOG090W0JMT	Duplicated
EOG090W0J0Z	Complete	EOG090W0JMU	Complete
EOG090W0J1J	Complete	EOG090W0JMX	Complete
EOG090W0J37	Duplicated	EOG090W0JN2	Complete
EOG090W0J37	Duplicated	EOG090W0JN7	Complete
EOG090W0J37	Duplicated	EOG090W0JOQ	Fragmented
EOG090W0J3P	Missing	EOG090W0JQ0	Missing
EOG090W0J3Q	Complete	EOG090W0JRX	Complete
EOG090W0J3R	Complete	EOG090W0JS6	Duplicated
EOG090W0J57	Complete	EOG090W0JS6	Duplicated
EOG090W0J6A	Complete	EOG090W0JS6	Duplicated
EOG090W0J6P	Complete	EOG090W0JS9	Complete
EOG090W0J7B	Complete	EOG090W0JSO	Complete
EOG090W0J88	Complete	EOG090W0JST	Duplicated
EOG090W0J8V	Fragmented	EOG090W0JST	Duplicated
EOG090W0J9P	Complete	EOG090W0JXV	Complete
EOG090W0JBN	Complete	EOG090W0JXW	Duplicated
EOG090W0JDA	Complete	EOG090W0JXW	Duplicated
EOG090W0JFZ	Fragmented	EOG090W0JXW	Duplicated
EOG090W0JH8	Duplicated	EOG090W0JYJ	Complete
EOG090W0JH8	Duplicated	EOG090W0JYN	Duplicated
EOG090W0JIL	Complete	EOG090W0JYN	Duplicated
EOG090W0JJQ	Complete	EOG090W0JZ5	Complete
EOG090W0JK3	Complete	EOG090W0K04	Complete
EOG090W0JKA	Complete	EOG090W0K07	Complete
EOG090W0JL5	Missing	EOG090W0K2G	Complete
EOG090W0JLT	Duplicated	EOG090W0K4Q	Complete
EOG090W0JLT	Duplicated	EOG090W0K4X	Complete
EOG090W0JMT	Complete	EOG090W0K51	Duplicated
EOG090W0JMU	Fragmented	EOG090W0K51	Duplicated
EOG090W0JMX	Complete	EOG090W0K5K	Complete
EOG090W0JN2	Complete	EOG090W0K6A	Complete
EOG090W0JN7	Complete	EOG090W0K88	Complete
EOG090W0JOQ	Fragmented	EOG090W0KFR	Complete
EOG090W0JQ0	Missing	EOG090W0KFZ	Complete
EOG090W0JRX	Complete	EOG090W0KI5	Complete
EOG090W0JS6	Complete	EOG090W0KIU	Complete
EOG090W0JS9	Complete	EOG090W0KJ3	Missing
EOG090W0JSO	Complete	EOG090W0KJA	Fragmented
EOG090W0JST	Duplicated	EOG090W0KKV	Duplicated
EOG090W0JST	Duplicated	EOG090W0KKV	Duplicated
EOG090W0JXV	Fragmented	EOG090W0KKV	Duplicated
EOG090W0JXW	Complete	EOG090W0KLR	Complete
EOG090W0JYJ	Complete	EOG090W0KMC	Fragmented
EOG090W0JYN	Complete	EOG090W0KP0	Complete
EOG090W0JZ5	Complete	EOG090W0KR6	Complete
EOG090W0K04	Complete	EOG090W0KS3	Complete
EOG090W0K07	Complete	EOG090W0KV4	Complete
EOG090W0K2G	Complete	EOG090W0KXF	Duplicated
EOG090W0K4Q	Complete	EOG090W0KXF	Duplicated
EOG090W0K4X	Complete	EOG090W0L1Y	Complete
EOG090W0K51	Duplicated	EOG090W0L42	Missing
EOG090W0K51	Duplicated	EOG090W0L4I	Complete
EOG090W0K5K	Complete	EOG090W0L6N	Complete
EOG090W0K6A	Complete	EOG090W0L7F	Complete
EOG090W0K88	Fragmented	EOG090W0L89	Complete
EOG090W0KFR	Complete	EOG090W0L8E	Complete
EOG090W0KFZ	Complete	EOG090W0L8P	Complete
EOG090W0KI5	Complete	EOG090W0L8W	Complete
EOG090W0KIU	Complete	EOG090W0LEN	Complete
EOG090W0KJ3	Complete	EOG090W0LFE	Complete
EOG090W0KJA	Fragmented	EOG090W0LHU	Complete
EOG090W0KKV	Duplicated	EOG090W0LIW	Complete
EOG090W0KKV	Duplicated	EOG090W0LJ0	Fragmented
EOG090W0KKV	Duplicated	EOG090W0LJB	Complete
EOG090W0KLR	Complete	EOG090W0LL3	Complete
EOG090W0KMC	Fragmented	EOG090W0LLV	Complete
EOG090W0KP0	Complete	EOG090W0LM4	Complete
EOG090W0KR6	Complete	EOG090W0LOM	Fragmented
EOG090W0KS3	Complete	EOG090W0LPX	Duplicated
EOG090W0KV4	Complete	EOG090W0LPX	Duplicated
EOG090W0KXF	Complete	EOG090W0LQX	Complete
EOG090W0L1Y	Missing	EOG090W0LRN	Complete
EOG090W0L42	Missing	EOG090W0LSM	Fragmented
EOG090W0L4I	Fragmented	EOG090W0LTJ	Complete
EOG090W0L6N	Duplicated	EOG090W0LWB	Complete
EOG090W0L6N	Duplicated	EOG090W0LWQ	Complete
EOG090W0L7F	Complete	EOG090W0M5Q	Missing
EOG090W0L89	Complete	EOG090W0M8F	Complete
EOG090W0L8E	Complete	EOG090W0MBV	Fragmented
EOG090W0L8P	Complete	EOG090W0MFJ	Complete
EOG090W0L8W	Complete	EOG090W0MFT	Complete
EOG090W0LEN	Complete	EOG090W0MIL	Complete
EOG090W0LFE	Complete	EOG090W0MK4	Complete
EOG090W0LHU	Complete	EOG090W0MLJ	Complete
EOG090W0LIW	Complete	EOG090W0MM4	Fragmented
EOG090W0LJ0	Complete	EOG090W0MNZ	Complete
EOG090W0LJB	Complete	EOG090W0MYQ	Complete
EOG090W0LL3	Complete	EOG090W0MZQ	Complete
EOG090W0LLV	Complete	EOG090W0N0N	Complete
EOG090W0LM4	Fragmented	EOG090W0N4N	Complete
EOG090W0LOM	Fragmented	EOG090W0N5S	Complete
EOG090W0LPX	Complete	EOG090W0N7H	Fragmented
EOG090W0LQX	Complete	EOG090W0N7U	Complete
EOG090W0LRN	Duplicated	EOG090W0NCE	Fragmented
EOG090W0LRN	Duplicated	EOG090W0NFV	Missing
EOG090W0LRN	Duplicated	EOG090W0NJA	Complete
EOG090W0LSM	Complete	EOG090W0NJU	Complete
EOG090W0LTJ	Complete	EOG090W0NK3	Complete
EOG090W0LWB	Complete	EOG090W0NO8	Complete
EOG090W0LWQ	Complete	EOG090W0NRT	Complete
EOG090W0M5Q	Missing	EOG090W0NTV	Missing
EOG090W0M8F	Duplicated	EOG090W0O4V	Duplicated
EOG090W0M8F	Duplicated	EOG090W0O4V	Duplicated
EOG090W0M8F	Duplicated	EOG090W0O82	Complete
EOG090W0MBV	Fragmented	EOG090W0O88	Fragmented
EOG090W0MFJ	Complete	EOG090W0ODH	Complete
EOG090W0MFT	Complete	EOG090W0OM7	Complete
EOG090W0MIL	Complete	EOG090W0ORD	Complete
EOG090W0MK4	Complete	EOG090W0ORX	Fragmented
EOG090W0MLJ	Complete	EOG090W0OS5	Missing
EOG090W0MM4	Fragmented	EOG090W0PDB	Complete
EOG090W0MNZ	Duplicated	EOG090W0PQO	Complete
EOG090W0MNZ	Duplicated	EOG090W0PW0	Missing
EOG090W0MYQ	Complete	EOG090W0PZH	Complete
EOG090W0MZQ	Complete	EOG090W0Q9X	Complete
EOG090W0N0N	Complete	EOG090W0QXM	Complete
EOG090W0N4N	Complete	EOG090W0R2X	Complete
EOG090W0N5S	Complete	EOG090W0RGQ	Missing
EOG090W0N7H	Fragmented	EOG090W0S6D	Complete
EOG090W0N7U	Complete	EOG090W0T3K	Complete
EOG090W0NCE	Fragmented
EOG090W0NFV	Complete
EOG090W0NJA	Complete
EOG090W0NJU	Complete
EOG090W0NK3	Complete
EOG090W0NO8	Complete
EOG090W0NRT	Complete
EOG090W0NTV	Missing
EOG090W0O4V	Duplicated
EOG090W0O4V	Duplicated
EOG090W0O82	Complete
EOG090W0O88	Missing
EOG090W0ODH	Duplicated
EOG090W0ODH	Duplicated
EOG090W0ODH	Duplicated
EOG090W0OM7	Complete
EOG090W0ORD	Complete
EOG090W0ORX	Fragmented
EOG090W0OS5	Fragmented
EOG090W0PDB	Complete
EOG090W0PQO	Complete
EOG090W0PW0	Missing
EOG090W0PZH	Complete
EOG090W0Q9X	Complete
EOG090W0QXM	Complete
EOG090W0R2X	Complete
EOG090W0RGQ	Fragmented
EOG090W0S6D	Complete
EOG090W0T3K	Complete
